# Supplementary material for: SWI/SNF interacts with cleavage and polyadenylation factors and facilitates pre-mRNA 3′ end processing
Source: PubMed Central journal article supplement — Nucleic Acids Res. 2018 May 31;46(16):8557–73. doi: 10.1093/nar/gky438 (PMC6144808; doi:10.1093/nar/gky438), 2018-05-31
Supplement: gky438_supplemental_files.pdf [file gky438_supplemental_files.pdf]

## **Additional Information**

### ***Additional Tables***

|                                                                                                                      |       |
|----------------------------------------------------------------------------------------------------------------------|-------|
| Table S1: Effects of dBRM depletion on the S2 transcriptome .....                                                    | p. 2  |
| Table S2: List of differentially expressed genes in S2 cells depleted of dBRM .....                                  | p. 3  |
| Table S3: List of dBRM-bound genes .....                                                                             | p. 4  |
| Table S4: List of genes in Cluster 1 .....                                                                           | p. 13 |
| Table S5: List of hBRG1 interactors .....                                                                            | p. 16 |
| Table S6: List of hBRM interactors .....                                                                             | p. 22 |
| Table S7: List of dBRM interactors .....                                                                             | p. 25 |
| Table S8: List of proteins detected in negative control IPs .....                                                    | p. 28 |
| Table S9: Expression of the mRNAs that code for the components of the<br>cleavage and polyadenylation machinery..... | p. 30 |

### ***Additional Figures***

|                                                                                                                                         |       |
|-----------------------------------------------------------------------------------------------------------------------------------------|-------|
| Figure S1: Correlation analysis of RNA-seq replicates .....                                                                             | p. 31 |
| Figure S2: Protein levels in RNAi and overexpression experiments .....                                                                  | p. 32 |
| Figure S3: dBRM ChIP-seq in S2 cells .....                                                                                              | p. 34 |
| Figure S4: Metagene analysis of RNA reads aligned at the cleavage site .....                                                            | p. 35 |
| Figure S5: The effect of dBRM depletion on the expression levels and cleavage<br>efficiency of four selected genes from Cluster 1 ..... | p. 35 |
| Figure S6: CPSF6 and RNAPII occupancy at TSSs .....                                                                                     | p. 36 |

### ***Additional Text***

|                        |       |
|------------------------|-------|
| Primer Sequences ..... | p. 37 |
|------------------------|-------|

**Table S1: Effects of dBRM depletion on the S2 transcriptome**

|                               | <b>dsGFP</b> | <b>dsBRM</b> |
|-------------------------------|--------------|--------------|
| <b>Number of mapped reads</b> | 48434393     | 39735394     |
| <b>Expressed genes</b>        | 10670        | 10482        |
| <b>Increased expression</b>   | 98           |              |
| <b>Decreased expression</b>   | 66           |              |

Expressed genes are genes with at least one count in either of the two replicates. Downregulated genes are genes that show a fold change BRM/GFP lower than 0.5 in each of two independent replicates. Upregulated genes are genes that show a fold change BRM/GFP higher than 2 in each of two independent replicates.

**Table S2: List of differentially expressed genes in dBRM-depleted cells****66 genes with decreased expression:**

|           |         |         |         |            |
|-----------|---------|---------|---------|------------|
| Alk       | CG14196 | CG4250  | CG8213  | lin-28     |
| beat-IIIc | CG14694 | CG42675 | CG9498  | neuroligin |
| brm       | CG15456 | CG42697 | CG9616  | Ppm1       |
| brn       | CG15642 | CG42821 | CG9624  | ptr        |
| CAH1      | CG18507 | CG43243 | chn     | RpS14a     |
| CanA1     | CG18605 | CG43291 | Cht8    | RpS19b     |
| CG10814   | CG18628 | CG43324 | CR43275 | sano       |
| CG10827   | CG30157 | CG4733  | CR43651 | snoRNA:O   |
| CG12116   | CG31279 | CG5773  | dmGlut  | r-CD1      |
| CG12398   | CG33307 | CG5867  | drl     | sug        |
| CG13386   | CG34330 | CG6163  | Epac    |            |
| CG13618   | CG3842  | CG6472  | Hakai   |            |
| CG13822   | CG3955  | CG7058  | Hsp67Bc |            |
| CG13897   | CG4019  | CG7509  | Kall    |            |

**98 genes with increased expression:**

|         |         |         |            |            |
|---------|---------|---------|------------|------------|
| CG42711 | CG14688 | CG3397  | CR40743    | mir-2279   |
| a10     | CG14717 | CG33970 | CR40766    | Muc30E     |
| Ance-5  | CG14955 | CG40005 | CR43240    | n-syb      |
| btsz    | CG15153 | CG4194  | CR43916    | Oat        |
| bw      | CG15528 | CG42343 | CR43975    | qin        |
| CG10006 | CG17150 | CG42368 | Cyp4d20    | Rbp6       |
| CG10086 | CG17290 | CG42562 | Damm       | Ret        |
| CG10175 | CG17386 | CG42817 | dlp        | Rya-r44F   |
| CG11034 | CG17732 | CG43797 | ds         | sn         |
| CG11147 | CG1774  | CG4576  | Gal        | snoRNA:1   |
| CG11226 | CG18754 | CG5160  | gk         | 85         |
| CG11384 | CG2993  | CG5731  | Gr43b      | snoRNA:Ps  |
| CG11395 | CG30355 | CG5758  | hale       | i18S-1377c |
| CG11852 | CG31259 | CG5895  | I-t        | stet       |
| CG13278 | CG31817 | CG6910  | Ir51a      | tara       |
| CG13458 | CG31952 | CG7997  | Ir54a      | Twdlalpha  |
| CG13659 | CG32091 | CG8550  | l(3)72Dr   | Ugt36Ba    |
| CG14022 | CG32354 | CG9360  | lectin-22C |            |
| CG14309 | CG32669 | CG9988  | lectin-24A |            |
| CG14372 | CG33017 | Cha     | lectin-    |            |
| CG14509 | CG33253 | CheB42c | 24Db       |            |

### Table S3: List of dBRM-bound genes

The list includes dBRM-bound genes identified by ChIP-seq in S2 cells using an antibody against the endogenous dBRM protein (Jordán-Pla et al., BMC Genomics, 2018).

|             |             |             |             |             |             |             |
|-------------|-------------|-------------|-------------|-------------|-------------|-------------|
| FBgn0038460 | FBgn0041607 | FBgn0031228 | FBgn0039528 | FBgn0040398 | FBgn0005612 | FBgn0039098 |
| FBgn0035558 | FBgn0052486 | FBgn0053465 | FBgn0003231 | FBgn0259938 | FBgn0086355 | FBgn0035496 |
| FBgn0040309 | FBgn0016920 | FBgn0010438 | FBgn0034396 | FBgn0011766 | FBgn0035710 | FBgn0001137 |
| FBgn0036463 | FBgn0001227 | FBgn0050197 | FBgn0035312 | FBgn0015229 | FBgn0025885 | FBgn0003067 |
| FBgn0063497 | FBgn0031461 | FBgn0035263 | FBgn0030894 | FBgn0052641 | FBgn0031150 | FBgn0034160 |
| FBgn0029895 | FBgn0037819 | FBgn0023507 | FBgn0001229 | FBgn0052640 | FBgn0003321 | FBgn0011672 |
| FBgn0033402 | FBgn0045761 | FBgn0262743 | FBgn0024734 | FBgn0053498 | FBgn0000546 | FBgn0051324 |
| FBgn0035097 | FBgn0035498 | FBgn0259740 | FBgn0011764 | FBgn0053878 | FBgn0250869 | FBgn0029823 |
| FBgn0030797 | FBgn0038784 | FBgn0030880 | FBgn0029935 | FBgn0040827 | FBgn0262656 | FBgn0003884 |
| FBgn0050160 | FBgn0040308 | FBgn0034501 | FBgn0034049 | FBgn0002719 | FBgn0037207 | FBgn0032935 |
| FBgn0262795 | FBgn0050280 | FBgn0260866 | FBgn0024980 | FBgn0262736 | FBgn0038420 | FBgn0035347 |
| FBgn0053868 | FBgn0033015 | FBgn0261588 | FBgn0030805 | FBgn0032025 | FBgn0051777 | FBgn0038149 |
| FBgn0004828 | FBgn0003396 | FBgn0051866 | FBgn0035626 | FBgn0086450 | FBgn0261550 | FBgn0036007 |
| FBgn0001332 | FBgn0022787 | FBgn0030941 | FBgn0031970 | FBgn0031939 | FBgn0010038 | FBgn0038407 |
| FBgn0000097 | FBgn0050089 | FBgn0050489 | FBgn0040609 | FBgn0039266 | FBgn0025631 | FBgn0036532 |
| FBgn0001226 | FBgn0015585 | FBgn0000071 | FBgn0031904 | FBgn0262823 | FBgn0027493 | FBgn0036623 |
| FBgn0029795 | FBgn0259834 | FBgn0029880 | FBgn0031526 | FBgn0262846 | FBgn0030300 | FBgn0020249 |
| FBgn0031453 | FBgn0036101 | FBgn0032330 | FBgn0040396 | FBgn0037164 | FBgn0040319 | FBgn0263593 |
| FBgn0039209 | FBgn0039464 | FBgn0010501 | FBgn0033312 | FBgn0262893 | FBgn0001098 | FBgn0032693 |
| FBgn0011705 | FBgn0262740 | FBgn0032900 | FBgn0033093 | FBgn0261800 | FBgn0262707 | FBgn0005634 |
| FBgn0032120 | FBgn0008654 | FBgn0260986 | FBgn0262576 | FBgn0001078 | FBgn0027547 | FBgn0029881 |
| FBgn0036288 | FBgn0051370 | FBgn0013733 | FBgn0031302 | FBgn0036684 | FBgn0032780 | FBgn0030893 |
| FBgn0052758 | FBgn0032178 | FBgn0038097 | FBgn0013279 | FBgn0032770 | FBgn0042135 | FBgn0034082 |
| FBgn0038198 | FBgn0003117 | FBgn0053557 | FBgn0035084 | FBgn0030400 | FBgn0011236 | FBgn0030318 |
| FBgn0037468 | FBgn0039613 | FBgn0003557 | FBgn0014380 | FBgn0028420 | FBgn0086687 | FBgn0037230 |
| FBgn0036858 | FBgn0032810 | FBgn0052572 | FBgn0020415 | FBgn0029825 | FBgn0001186 | FBgn0000017 |
| FBgn0039492 | FBgn0026562 | FBgn0037518 | FBgn0011837 | FBgn0016131 | FBgn0085443 | FBgn0003870 |
| FBgn0011661 | FBgn0028408 | FBgn0027280 | FBgn0029507 | FBgn0003079 | FBgn0033188 | FBgn0041337 |
| FBgn0038197 | FBgn0050069 | FBgn0033374 | FBgn0025683 | FBgn0052594 | FBgn0033782 | FBgn0023407 |
| FBgn0262976 | FBgn0027561 | FBgn0037874 | FBgn0041184 | FBgn0063498 | FBgn0039487 | FBgn0023167 |
| FBgn0050281 | FBgn0010352 | FBgn0000221 | FBgn0034638 | FBgn0034718 | FBgn0000045 | FBgn0015222 |
| FBgn0003888 | FBgn0053346 | FBgn0053260 | FBgn0026753 | FBgn0261508 | FBgn0010358 | FBgn0035445 |
| FBgn0034405 | FBgn0063496 | FBgn0034354 | FBgn0033421 | FBgn0020416 | FBgn0029095 | FBgn0027087 |
| FBgn0032720 | FBgn0038504 | FBgn0261383 | FBgn0085359 | FBgn0003963 | FBgn0039593 | FBgn0001225 |
| FBgn0004362 | FBgn0000163 | FBgn0034420 | FBgn0000308 | FBgn0260011 | FBgn0003748 | FBgn0000318 |
| FBgn0031974 | FBgn0010704 | FBgn0038680 | FBgn0024293 | FBgn0036746 | FBgn0032147 | FBgn0086708 |
| FBgn0035578 | FBgn0053926 | FBgn0260747 | FBgn0020762 | FBgn0002865 | FBgn0010300 | FBgn0025391 |
| FBgn0030073 | FBgn0051075 | FBgn0052982 | FBgn0014011 | FBgn0029877 | FBgn0263120 | FBgn0039737 |

|             |             |             |             |             |             |             |
|-------------|-------------|-------------|-------------|-------------|-------------|-------------|
| FBgn0028550 | FBgn0030595 | FBgn0034139 | FBgn0030869 | FBgn0033544 | FBgn0031888 | FBgn0053831 |
| FBgn0000043 | FBgn0037802 | FBgn0031145 | FBgn0028953 | FBgn0025720 | FBgn0050050 | FBgn0053817 |
| FBgn0261592 | FBgn0037165 | FBgn0037076 | FBgn0051673 | FBgn0034012 | FBgn0034091 | FBgn0053870 |
| FBgn0259923 | FBgn0037012 | FBgn0026439 | FBgn0039431 | FBgn0030864 | FBgn0003360 | FBgn0053874 |
| FBgn0025630 | FBgn0085405 | FBgn0033367 | FBgn0025456 | FBgn0011286 | FBgn0035083 | FBgn0053876 |
| FBgn0030806 | FBgn0001092 | FBgn0033204 | FBgn0013765 | FBgn0002922 | FBgn0050011 | FBgn0053880 |
| FBgn0025613 | FBgn0039025 | FBgn0259937 | FBgn0038260 | FBgn0005671 | FBgn0027556 | FBgn0053894 |
| FBgn0040765 | FBgn0031417 | FBgn0024947 | FBgn0000320 | FBgn0004888 | FBgn0264693 | FBgn0053806 |
| FBgn0259821 | FBgn0262719 | FBgn0086371 | FBgn0260632 | FBgn0016078 | FBgn0052512 | FBgn0053809 |
| FBgn0035989 | FBgn0034166 | FBgn0032364 | FBgn0264562 | FBgn0022355 | FBgn0035499 | FBgn0053821 |
| FBgn0051314 | FBgn0033502 | FBgn0011754 | FBgn0038412 | FBgn0035060 | FBgn0030486 | FBgn0053824 |
| FBgn0034282 | FBgn0026056 | FBgn0032456 | FBgn0033706 | FBgn0034870 | FBgn0051687 | FBgn0053827 |
| FBgn0035147 | FBgn0053129 | FBgn0040091 | FBgn0004652 | FBgn0250785 | FBgn0011742 | FBgn0053845 |
| FBgn0010397 | FBgn0053548 | FBgn0039494 | FBgn0038068 | FBgn0051216 | FBgn0259984 | FBgn0053851 |
| FBgn0020493 | FBgn0028394 | FBgn0053469 | FBgn0259876 | FBgn0038853 | FBgn0037659 | FBgn0053854 |
| FBgn0028956 | FBgn0030935 | FBgn0250867 | FBgn0030616 | FBgn0259174 | FBgn0066292 | FBgn0053873 |
| FBgn0038419 | FBgn0262595 | FBgn0025806 | FBgn0027594 | FBgn0030510 | FBgn0037731 | FBgn0053881 |
| FBgn0032282 | FBgn0030478 | FBgn0260475 | FBgn0035309 | FBgn0039639 | FBgn0086447 | FBgn0053893 |
| FBgn0010602 | FBgn0036030 | FBgn0019643 | FBgn0037715 | FBgn0005695 | FBgn0034219 | FBgn0053899 |
| FBgn0020513 | FBgn0031474 | FBgn0030695 | FBgn0085440 | FBgn0000564 | FBgn0040089 | FBgn0053903 |
| FBgn0016978 | FBgn0030963 | FBgn0002732 | FBgn0029853 | FBgn0029707 | FBgn0261548 | FBgn0020644 |
| FBgn0035049 | FBgn0053170 | FBgn0039755 | FBgn0085370 | FBgn0000463 | FBgn0034224 | FBgn0030608 |
| FBgn0035299 | FBgn0028955 | FBgn0032663 | FBgn0033781 | FBgn0030927 | FBgn0259481 | FBgn0052475 |
| FBgn0029975 | FBgn0023479 | FBgn0011826 | FBgn0042094 | FBgn0045038 | FBgn0037204 | FBgn0053497 |
| FBgn0042175 | FBgn0002931 | FBgn0050362 | FBgn0031307 | FBgn0052437 | FBgn0053240 | FBgn0053499 |
| FBgn0039756 | FBgn0264495 | FBgn0042110 | FBgn0051694 | FBgn0085423 | FBgn0028415 | FBgn0053241 |
| FBgn0046685 | FBgn0000536 | FBgn0026090 | FBgn0040212 | FBgn0034313 | FBgn0003356 | FBgn0053908 |
| FBgn0032721 | FBgn0051038 | FBgn0033377 | FBgn0031646 | FBgn0028519 | FBgn0261636 | FBgn0020238 |
| FBgn0053462 | FBgn0051145 | FBgn0030749 | FBgn0261270 | FBgn0264605 | FBgn0031277 | FBgn0002778 |
| FBgn0041629 | FBgn0036984 | FBgn0261549 | FBgn0038194 | FBgn0029878 | FBgn0261560 | FBgn0037636 |
| FBgn0034418 | FBgn0032036 | FBgn0026713 | FBgn0040271 | FBgn0010246 | FBgn0046763 | FBgn0040904 |
| FBgn0025574 | FBgn0013272 | FBgn0039798 | FBgn0051522 | FBgn0083966 | FBgn0053243 | FBgn0028863 |
| FBgn0067102 | FBgn0052985 | FBgn0038353 | FBgn0085407 | FBgn0029167 | FBgn0026084 | FBgn0034356 |
| FBgn0039776 | FBgn0036891 | FBgn0027579 | FBgn0039789 | FBgn0028988 | FBgn0053907 | FBgn0000360 |
| FBgn0031975 | FBgn0032782 | FBgn0262169 | FBgn0032189 | FBgn0041094 | FBgn0051835 | FBgn0029508 |
| FBgn0038475 | FBgn0003218 | FBgn0031403 | FBgn0260798 | FBgn0026582 | FBgn0029504 | FBgn0259817 |
| FBgn0028543 | FBgn0085282 | FBgn0033050 | FBgn0031571 | FBgn0038627 | FBgn0051827 | FBgn0261404 |
| FBgn0020496 | FBgn0030183 | FBgn0030743 | FBgn0250823 | FBgn0052988 | FBgn0085506 | FBgn0031182 |
| FBgn0032139 | FBgn0027095 | FBgn0051102 | FBgn0053329 | FBgn0030349 | FBgn0085692 | FBgn0010041 |
| FBgn0038722 | FBgn0034158 | FBgn0262362 | FBgn0011211 | FBgn0038020 | FBgn0260953 | FBgn0053902 |
| FBgn0037057 | FBgn0026144 | FBgn0039264 | FBgn0035708 | FBgn0263865 | FBgn0260954 | FBgn0042127 |
| FBgn0030093 | FBgn0027494 | FBgn0010238 | FBgn0040514 | FBgn0085307 | FBgn0264545 | FBgn0005660 |
| FBgn0261014 | FBgn0010040 | FBgn0262579 | FBgn0038347 | FBgn0003046 | FBgn0053819 | FBgn0261812 |

|             |             |             |             |             |             |             |
|-------------|-------------|-------------|-------------|-------------|-------------|-------------|
| FBgn0036592 | FBgn0036859 | FBgn0033602 | FBgn0039208 | FBgn0037180 | FBgn0053816 | FBgn0053839 |
| FBgn0029720 | FBgn0038447 | FBgn0052554 | FBgn0034631 | FBgn0025642 | FBgn0053822 | FBgn0053842 |
| FBgn0037181 | FBgn0031373 | FBgn0004430 | FBgn0003175 | FBgn0001313 | FBgn0053825 | FBgn0053848 |
| FBgn0015568 | FBgn0261722 | FBgn0014020 | FBgn0036618 | FBgn0052196 | FBgn0053828 | FBgn0053857 |
| FBgn0040798 | FBgn0003034 | FBgn0086265 | FBgn0024984 | FBgn0036773 | FBgn0053837 | FBgn0053860 |
| FBgn0259147 | FBgn0000299 | FBgn0015286 | FBgn0037147 | FBgn0031129 | FBgn0053840 | FBgn0053863 |
| FBgn0031031 | FBgn0030999 | FBgn0000210 | FBgn0033860 | FBgn0003525 | FBgn0053843 | FBgn0053869 |
| FBgn0010425 | FBgn0263490 | FBgn0003302 | FBgn0029727 | FBgn0037443 | FBgn0053846 | FBgn0053871 |
| FBgn0051909 | FBgn0039434 | FBgn0033207 | FBgn0035256 | FBgn0031923 | FBgn0053852 | FBgn0053879 |
| FBgn0041210 | FBgn0037428 | FBgn0030979 | FBgn0262574 | FBgn0034199 | FBgn0053855 | FBgn0053883 |
| FBgn0040985 | FBgn0028904 | FBgn0034105 | FBgn0261583 | FBgn0052823 | FBgn0053858 | FBgn0053885 |
| FBgn0034899 | FBgn0003415 | FBgn0051741 | FBgn0038645 | FBgn0034885 | FBgn0053861 | FBgn0053887 |
| FBgn0030850 | FBgn0035611 | FBgn0041156 | FBgn0035551 | FBgn0051131 | FBgn0053808 | FBgn0053891 |
| FBgn0052369 | FBgn0013726 | FBgn0029737 | FBgn0039303 | FBgn0001314 | FBgn0053820 | FBgn0053895 |
| FBgn0030900 | FBgn0030159 | FBgn0031279 | FBgn0019809 | FBgn0058064 | FBgn0053823 | FBgn0053897 |
| FBgn0003371 | FBgn0259789 | FBgn0036838 | FBgn0029518 | FBgn0036905 | FBgn0053826 | FBgn0053905 |
| FBgn0030582 | FBgn0053169 | FBgn0031466 | FBgn0001983 | FBgn0025837 | FBgn0053829 | FBgn0053909 |
| FBgn0038941 | FBgn0033588 | FBgn0037994 | FBgn0046258 | FBgn0028864 | FBgn0053835 | FBgn0040037 |
| FBgn0261434 | FBgn0031520 | FBgn0035412 | FBgn0037225 | FBgn0028517 | FBgn0053838 | FBgn0046323 |
| FBgn0003997 | FBgn0035544 | FBgn0261788 | FBgn0039038 | FBgn0050031 | FBgn0053844 | FBgn0261399 |
| FBgn0036837 | FBgn0030641 | FBgn0030343 | FBgn0028740 | FBgn0028537 | FBgn0053847 | FBgn0053237 |
| FBgn0038161 | FBgn0029748 | FBgn0020643 | FBgn0036161 | FBgn0051780 | FBgn0053850 | FBgn0053238 |
| FBgn0013433 | FBgn0031088 | FBgn0030107 | FBgn0029082 | FBgn0260479 | FBgn0053853 | FBgn0053239 |
| FBgn0034292 | FBgn0033592 | FBgn0086372 | FBgn0051908 | FBgn0052857 | FBgn0053859 | FBgn0053245 |
| FBgn0052241 | FBgn0002609 | FBgn0028397 | FBgn0039637 | FBgn0053496 | FBgn0053862 | FBgn0053246 |
| FBgn0001114 | FBgn0030588 | FBgn0015565 | FBgn0039323 | FBgn0058245 | FBgn0053872 | FBgn0262516 |
| FBgn0010113 | FBgn0053060 | FBgn0037414 | FBgn0053667 | FBgn0085496 | FBgn0053882 | FBgn0042086 |
| FBgn0053665 | FBgn0028738 | FBgn0036211 | FBgn0053236 | FBgn0085498 | FBgn0053884 | FBgn0051354 |
| FBgn0067903 | FBgn0053217 | FBgn0038529 | FBgn0053807 | FBgn0085520 | FBgn0053886 | FBgn0042125 |
| FBgn0038257 | FBgn0030202 | FBgn0040259 | FBgn0053194 | FBgn0085539 | FBgn0053888 | FBgn0001315 |
| FBgn0031296 | FBgn0036102 | FBgn0028509 | FBgn0037178 | FBgn0085541 | FBgn0053890 | FBgn0046697 |
| FBgn0004432 | FBgn0029091 | FBgn0031741 | FBgn0035872 | FBgn0085546 | FBgn0053892 | FBgn0037811 |
| FBgn0260484 | FBgn0030596 | FBgn0259716 | FBgn0029771 | FBgn0085633 | FBgn0053896 | FBgn0052786 |
| FBgn0083946 | FBgn0263993 | FBgn0040608 | FBgn0053244 | FBgn0085644 | FBgn0053898 | FBgn0042118 |
| FBgn0261268 | FBgn0029501 | FBgn0039436 | FBgn0052500 | FBgn0084017 | FBgn0053904 | FBgn0033658 |
| FBgn0053463 | FBgn0037172 | FBgn0031784 | FBgn0039109 | FBgn0085658 | FBgn0053906 | FBgn0263121 |
| FBgn0035022 | FBgn0061198 | FBgn0010294 | FBgn0004198 | FBgn0260434 | FBgn0053910 | FBgn0034179 |
| FBgn0028875 | FBgn0033363 | FBgn0042693 | FBgn0013278 | FBgn0261334 | FBgn0053803 | FBgn0046698 |
| FBgn0085663 | FBgn0014454 | FBgn0016034 | FBgn0030882 | FBgn0261361 | FBgn0053815 | FBgn0034639 |
| FBgn0035050 | FBgn0030160 | FBgn0033141 | FBgn0038888 | FBgn0264544 | FBgn0053818 | FBgn0025390 |
| FBgn0003249 | FBgn0020641 | FBgn0036289 | FBgn0085556 | FBgn0086900 | FBgn0053830 | FBgn0040942 |
| FBgn0030985 | FBgn0033591 | FBgn0030832 | FBgn0260713 | FBgn0010359 | FBgn0053833 | FBgn0037170 |
| FBgn0038820 | FBgn0052626 | FBgn0037411 | FBgn0032140 | FBgn0053810 | FBgn0053836 | FBgn0261360 |

|             |             |             |             |             |             |             |
|-------------|-------------|-------------|-------------|-------------|-------------|-------------|
| FBgn0029539 | FBgn0031449 | FBgn0033638 | FBgn0029831 | FBgn0032184 | FBgn0000529 | FBgn0085313 |
| FBgn0037007 | FBgn0031969 | FBgn0030921 | FBgn0033649 | FBgn0263850 | FBgn0250815 | FBgn0030640 |
| FBgn0053664 | FBgn0261988 | FBgn0020278 | FBgn0033154 | FBgn0038516 | FBgn0036316 | FBgn0035001 |
| FBgn0035968 | FBgn0052602 | FBgn0052529 | FBgn0000606 | FBgn0013771 | FBgn0050273 | FBgn0004431 |
| FBgn0034819 | FBgn0040257 | FBgn0004779 | FBgn0039378 | FBgn0040038 | FBgn0028979 | FBgn0263759 |
| FBgn0016076 | FBgn0034180 | FBgn0261927 | FBgn0052188 | FBgn0014002 | FBgn0037350 | FBgn0262735 |
| FBgn0260225 | FBgn0053834 | FBgn0037818 | FBgn0029801 | FBgn0051958 | FBgn0033677 | FBgn0038487 |
| FBgn0051617 | FBgn0026718 | FBgn0030540 | FBgn0037167 | FBgn0025115 | FBgn0261444 | FBgn0050042 |
| FBgn0261688 | FBgn0035806 | FBgn0031940 | FBgn0031894 | FBgn0034602 | FBgn0011726 | FBgn0030537 |
| FBgn0036765 | FBgn0000568 | FBgn0035397 | FBgn0260455 | FBgn0035453 | FBgn0036177 | FBgn0035858 |
| FBgn0021738 | FBgn0083941 | FBgn0085612 | FBgn0038790 | FBgn0038660 | FBgn0031861 | FBgn0032490 |
| FBgn0052056 | FBgn0032779 | FBgn0053801 | FBgn0034644 | FBgn0031746 | FBgn0036639 | FBgn0036013 |
| FBgn0016715 | FBgn0053113 | FBgn0003300 | FBgn0025111 | FBgn0053690 | FBgn0027610 | FBgn0050350 |
| FBgn0262890 | FBgn0030665 | FBgn0032969 | FBgn0030482 | FBgn0035861 | FBgn0052074 | FBgn0259171 |
| FBgn0030104 | FBgn0010044 | FBgn0040637 | FBgn0034094 | FBgn0029667 | FBgn0263097 | FBgn0085599 |
| FBgn0031220 | FBgn0250753 | FBgn0263400 | FBgn0032281 | FBgn0040238 | FBgn0031722 | FBgn0036791 |
| FBgn0033112 | FBgn0013343 | FBgn0030826 | FBgn0003980 | FBgn0033362 | FBgn0039448 | FBgn0032021 |
| FBgn0030218 | FBgn0052213 | FBgn0036870 | FBgn0030808 | FBgn0037976 | FBgn0034011 | FBgn0036415 |
| FBgn0004919 | FBgn0033789 | FBgn0032284 | FBgn0025644 | FBgn0015801 | FBgn0053272 | FBgn0260868 |
| FBgn0036503 | FBgn0058172 | FBgn0037179 | FBgn0052103 | FBgn0035258 | FBgn0040729 | FBgn0038074 |
| FBgn0023526 | FBgn0033636 | FBgn0034321 | FBgn0033283 | FBgn0031957 | FBgn0034328 | FBgn0032943 |
| FBgn0032283 | FBgn0039820 | FBgn0032694 | FBgn0033868 | FBgn0040074 | FBgn0003090 | FBgn0030912 |
| FBgn0050457 | FBgn0250906 | FBgn0039045 | FBgn0053813 | FBgn0262845 | FBgn0040777 | FBgn0000355 |
| FBgn0040365 | FBgn0085491 | FBgn0023215 | FBgn0000253 | FBgn0051007 | FBgn0067783 | FBgn0031804 |
| FBgn0010228 | FBgn0004780 | FBgn0019952 | FBgn0039588 | FBgn0259229 | FBgn0052301 | FBgn0035267 |
| FBgn0053668 | FBgn0029657 | FBgn0002930 | FBgn0039444 | FBgn0062412 | FBgn0261507 | FBgn0040922 |
| FBgn0039774 | FBgn0052779 | FBgn0039523 | FBgn0044051 | FBgn0035434 | FBgn0031644 | FBgn0052564 |
| FBgn0035005 | FBgn0004861 | FBgn0039452 | FBgn0035189 | FBgn0052170 | FBgn0010433 | FBgn0041092 |
| FBgn0004425 | FBgn0024941 | FBgn0054005 | FBgn0016694 | FBgn0031943 | FBgn0015576 | FBgn0259170 |
| FBgn0061209 | FBgn0038220 | FBgn0032280 | FBgn0036731 | FBgn0004782 | FBgn0250834 | FBgn0030329 |
| FBgn0037913 | FBgn0024245 | FBgn0030334 | FBgn0029813 | FBgn0000055 | FBgn0259237 | FBgn0027348 |
| FBgn0037912 | FBgn0011276 | FBgn0036438 | FBgn0039381 | FBgn0000056 | FBgn0051810 | FBgn0028520 |
| FBgn0013984 | FBgn0003042 | FBgn0029645 | FBgn0033850 | FBgn0030156 | FBgn0030432 | FBgn0030937 |
| FBgn0031141 | FBgn0032734 | FBgn0030028 | FBgn0040949 | FBgn0042146 | FBgn0039811 | FBgn0040918 |
| FBgn0051710 | FBgn0040364 | FBgn0050025 | FBgn0067779 | FBgn0010435 | FBgn0040828 | FBgn0038720 |
| FBgn0036576 | FBgn0029590 | FBgn0037144 | FBgn0012042 | FBgn0038240 | FBgn0011695 | FBgn0004654 |
| FBgn0033981 | FBgn0035554 | FBgn0053265 | FBgn0002567 | FBgn0038750 | FBgn0029866 | FBgn0052246 |
| FBgn0030933 | FBgn0025687 | FBgn0038588 | FBgn0050417 | FBgn0030038 | FBgn0013972 | FBgn0003513 |
| FBgn0033518 | FBgn0010909 | FBgn0259198 | FBgn0263402 | FBgn0030041 | FBgn0015011 | FBgn0261259 |
| FBgn0053487 | FBgn0053242 | FBgn0032645 | FBgn0053099 | FBgn0036591 | FBgn0030938 | FBgn0031785 |
| FBgn0260960 | FBgn0031763 | FBgn0004583 | FBgn0040349 | FBgn0034010 | FBgn0037937 | FBgn0037129 |
| FBgn0053804 | FBgn0085252 | FBgn0038708 | FBgn0000158 | FBgn0026160 | FBgn0004777 | FBgn0040362 |
| FBgn0003715 | FBgn0044011 | FBgn0033597 | FBgn0040799 | FBgn0032897 | FBgn0035542 | FBgn0050458 |

|             |             |             |             |             |             |             |
|-------------|-------------|-------------|-------------|-------------|-------------|-------------|
| FBgn0030505 | FBgn0085354 | FBgn0027930 | FBgn0050502 | FBgn0262793 | FBgn0036862 | FBgn0029996 |
| FBgn0051437 | FBgn0033275 | FBgn0038482 | FBgn0005624 | FBgn0030459 | FBgn0003326 | FBgn0035087 |
| FBgn0030824 | FBgn0020653 | FBgn0052373 | FBgn0038730 | FBgn0034973 | FBgn0035153 | FBgn0264357 |
| FBgn0029812 | FBgn0036717 | FBgn0038210 | FBgn0039440 | FBgn0038175 | FBgn0038733 | FBgn0033787 |
| FBgn0036324 | FBgn0033628 | FBgn0030398 | FBgn0264564 | FBgn0010015 | FBgn0041247 | FBgn0051697 |
| FBgn0086448 | FBgn0029646 | FBgn0263404 | FBgn0038160 | FBgn0031130 | FBgn0085304 | FBgn0053307 |
| FBgn0003411 | FBgn0031178 | FBgn0085379 | FBgn0046880 | FBgn0011674 | FBgn0025525 | FBgn0040532 |
| FBgn0036419 | FBgn0030949 | FBgn0037416 | FBgn0030758 | FBgn0037422 | FBgn0032587 | FBgn0263355 |
| FBgn0028906 | FBgn0037456 | FBgn0038132 | FBgn0033587 | FBgn0040794 | FBgn0053856 | FBgn0058470 |
| FBgn0243516 | FBgn0030026 | FBgn0032965 | FBgn0051104 | FBgn0035510 | FBgn0053875 | FBgn0003507 |
| FBgn0020647 | FBgn0052073 | FBgn0031374 | FBgn0037486 | FBgn0034838 | FBgn0053889 | FBgn0051253 |
| FBgn0261871 | FBgn0014019 | FBgn0037124 | FBgn0038682 | FBgn0003145 | FBgn0033980 | FBgn0003887 |
| FBgn0000442 | FBgn0033149 | FBgn0011768 | FBgn0000711 | FBgn0029648 | FBgn0053865 | FBgn0260635 |
| FBgn0050431 | FBgn0033145 | FBgn0039920 | FBgn0038731 | FBgn0039939 | FBgn0013750 | FBgn0037521 |
| FBgn0013981 | FBgn0051668 | FBgn0030162 | FBgn0052102 | FBgn0052551 | FBgn0036844 | FBgn0040850 |
| FBgn0035856 | FBgn0263930 | FBgn0024251 | FBgn0034069 | FBgn0000964 | FBgn0037310 | FBgn0028360 |
| FBgn0261832 | FBgn0026136 | FBgn0024182 | FBgn0030280 | FBgn0052038 | FBgn0000567 | FBgn0031808 |
| FBgn0001219 | FBgn0011244 | FBgn0022700 | FBgn0046875 | FBgn0083938 | FBgn0037992 | FBgn0052115 |
| FBgn0029644 | FBgn0027356 | FBgn0030541 | FBgn0035931 | FBgn0085410 | FBgn0015791 | FBgn0262686 |
| FBgn0033249 | FBgn0004666 | FBgn0003943 | FBgn0263934 | FBgn0040281 | FBgn0035388 | FBgn0030079 |
| FBgn0031654 | FBgn0261631 | FBgn0050364 | FBgn0000477 | FBgn0033639 | FBgn0263046 | FBgn0026263 |
| FBgn0053276 | FBgn0003721 | FBgn0031489 | FBgn0051778 | FBgn0040906 | FBgn0263598 | FBgn0261238 |
| FBgn0067861 | FBgn0085196 | FBgn0039768 | FBgn0024288 | FBgn0036728 | FBgn0000662 | FBgn0050334 |
| FBgn0002735 | FBgn0085256 | FBgn0050418 | FBgn0037677 | FBgn0052644 | FBgn0262880 | FBgn0262979 |
| FBgn0046873 | FBgn0051191 | FBgn0261243 | FBgn0014143 | FBgn0051813 | FBgn0030992 | FBgn0033063 |
| FBgn0039000 | FBgn0003134 | FBgn0032181 | FBgn0030827 | FBgn0051438 | FBgn0038291 | FBgn0033483 |
| FBgn0051230 | FBgn0036707 | FBgn0037412 | FBgn0260487 | FBgn0050053 | FBgn0038484 | FBgn0051352 |
| FBgn0026389 | FBgn0040502 | FBgn0083940 | FBgn0031441 | FBgn0036235 | FBgn0026170 | FBgn0051798 |
| FBgn0041111 | FBgn0036638 | FBgn0023415 | FBgn0030954 | FBgn0040206 | FBgn0001145 | FBgn0015221 |
| FBgn0028886 | FBgn0035736 | FBgn0033786 | FBgn0053642 | FBgn0031559 | FBgn0030529 | FBgn0033196 |
| FBgn0036857 | FBgn0036017 | FBgn0085195 | FBgn0031176 | FBgn0263346 | FBgn0015371 | FBgn0085308 |
| FBgn0033793 | FBgn0050384 | FBgn0030358 | FBgn0030493 | FBgn0037206 | FBgn0000079 | FBgn0040285 |
| FBgn0040388 | FBgn0031988 | FBgn0034793 | FBgn0033327 | FBgn0003071 | FBgn0034897 | FBgn0044826 |
| FBgn0033988 | FBgn0031879 | FBgn0015376 | FBgn0038342 | FBgn0038262 | FBgn0015776 | FBgn0031952 |
| FBgn0264087 | FBgn0033729 | FBgn0013263 | FBgn0085273 | FBgn0001077 | FBgn0052208 | FBgn0033095 |
| FBgn0035171 | FBgn0040034 | FBgn0001258 | FBgn0053769 | FBgn0038799 | FBgn0041150 | FBgn0001104 |
| FBgn0042627 | FBgn0262468 | FBgn0051259 | FBgn0030663 | FBgn0037975 | FBgn0037131 | FBgn0024329 |
| FBgn0010575 | FBgn0261815 | FBgn0036619 | FBgn0052762 | FBgn0038526 | FBgn0026417 | FBgn0037217 |
| FBgn0037176 | FBgn0016794 | FBgn0030566 | FBgn0020371 | FBgn0035582 | FBgn0022709 | FBgn0013983 |
| FBgn0023197 | FBgn0037552 | FBgn0031023 | FBgn0033594 | FBgn0000551 | FBgn0053502 | FBgn0023535 |
| FBgn0029705 | FBgn0029827 | FBgn0000359 | FBgn0033851 | FBgn0037798 | FBgn0261862 | FBgn0035346 |
| FBgn0044048 | FBgn0050118 | FBgn0037571 | FBgn0261675 | FBgn0025836 | FBgn0039800 | FBgn0085365 |
| FBgn0038028 | FBgn0002526 | FBgn0035358 | FBgn0040507 | FBgn0261336 | FBgn0261822 | FBgn0044047 |



|             |             |             |             |             |             |             |
|-------------|-------------|-------------|-------------|-------------|-------------|-------------|
| FBgn0004569 | FBgn0035216 | FBgn0037917 | FBgn0001257 | FBgn0031054 | FBgn0010303 | FBgn0051087 |
| FBgn0058002 | FBgn0035132 | FBgn0029603 | FBgn0001223 | FBgn0030583 | FBgn0031968 | FBgn0000382 |
| FBgn0043806 | FBgn0260748 | FBgn0035426 | FBgn0001228 | FBgn0027335 | FBgn0036732 | FBgn0022893 |
| FBgn0022160 | FBgn0032167 | FBgn0050022 | FBgn0053503 | FBgn0004649 | FBgn0261617 | FBgn0003345 |
| FBgn0027598 | FBgn0041585 | FBgn0029770 | FBgn0050382 | FBgn0261445 | FBgn0036616 | FBgn0260659 |
| FBgn0001994 | FBgn0003209 | FBgn0004889 | FBgn0034647 | FBgn0031897 | FBgn0003502 | FBgn0031501 |
| FBgn0024238 | FBgn0035085 | FBgn0038242 | FBgn0039694 | FBgn0000575 | FBgn0004606 | FBgn0051116 |
| FBgn0030484 | FBgn0037162 | FBgn0262141 | FBgn0030234 | FBgn0030955 | FBgn0028484 | FBgn0033101 |
| FBgn0034143 | FBgn0034142 | FBgn0036165 | FBgn0039507 | FBgn0036449 | FBgn0037315 | FBgn0038476 |
| FBgn0050421 | FBgn0030452 | FBgn0053919 | FBgn0031948 | FBgn0029123 | FBgn0030625 | FBgn0030876 |
| FBgn0069947 | FBgn0038865 | FBgn0261561 | FBgn0031381 | FBgn0015513 | FBgn0035023 | FBgn0034709 |
| FBgn0014010 | FBgn0010762 | FBgn0034377 | FBgn0261975 | FBgn0051683 | FBgn0034804 | FBgn0050424 |
| FBgn0039419 | FBgn0040649 | FBgn0036822 | FBgn0263749 | FBgn0050269 | FBgn0037347 | FBgn0086910 |
| FBgn0046322 | FBgn0001128 | FBgn0015623 | FBgn0262981 | FBgn0036577 | FBgn0052445 | FBgn0038947 |
| FBgn0035795 | FBgn0052280 | FBgn0263030 | FBgn0028670 | FBgn0000166 | FBgn0053491 | FBgn0038804 |
| FBgn0032692 | FBgn0034194 | FBgn0029514 | FBgn0027601 | FBgn0015569 | FBgn0038803 | FBgn0031871 |
| FBgn0026179 | FBgn0086358 | FBgn0000083 | FBgn0052939 | FBgn0035407 | FBgn0036821 | FBgn0025864 |
| FBgn0045063 | FBgn0052603 | FBgn0030338 | FBgn0037548 | FBgn0020386 | FBgn0040153 | FBgn0030599 |
| FBgn0035208 | FBgn0034736 | FBgn0028990 | FBgn0043070 | FBgn0051785 | FBgn0020389 | FBgn0031201 |
| FBgn0002413 | FBgn0000721 | FBgn0259168 | FBgn0050344 | FBgn0052687 | FBgn0031971 | FBgn0037646 |
| FBgn0031012 | FBgn0031516 | FBgn0023524 | FBgn0004133 | FBgn0013773 | FBgn0036134 | FBgn0037296 |
| FBgn0261885 | FBgn0050000 | FBgn0050054 | FBgn0030653 | FBgn0034397 | FBgn0038646 | FBgn0004878 |
| FBgn0026259 | FBgn0263102 | FBgn0085408 | FBgn0030310 | FBgn0037307 | FBgn0000395 | FBgn0031993 |
| FBgn0262582 | FBgn0043364 | FBgn0086253 | FBgn0052984 | FBgn0015765 | FBgn0085377 | FBgn0038258 |
| FBgn0000273 | FBgn0260006 | FBgn0031032 | FBgn0030237 | FBgn0004647 | FBgn0010497 | FBgn0013767 |
| FBgn0031037 | FBgn0243514 | FBgn0035082 | FBgn0052138 | FBgn0036749 | FBgn0020412 | FBgn0031816 |
| FBgn0037875 | FBgn0005636 | FBgn0036556 | FBgn0050497 | FBgn0039265 | FBgn0030884 | FBgn0015521 |
| FBgn0010053 | FBgn0035497 | FBgn0004507 | FBgn0037222 | FBgn0028369 | FBgn0027111 | FBgn0001218 |
| FBgn0262519 | FBgn0000241 | FBgn0014417 | FBgn0041789 | FBgn0260234 | FBgn0052182 | FBgn0043069 |
| FBgn0052091 | FBgn0035767 | FBgn0032863 | FBgn0033919 | FBgn0038749 | FBgn0039026 | FBgn0020236 |
| FBgn0013772 | FBgn0034335 | FBgn0032503 | FBgn0039130 | FBgn0000578 | FBgn0036835 | FBgn0002787 |
| FBgn0260481 | FBgn0038069 | FBgn0052591 | FBgn0010043 | FBgn0027929 | FBgn0038391 | FBgn0030351 |
| FBgn0001942 | FBgn0036493 | FBgn0028717 | FBgn0039831 | FBgn0033538 | FBgn0012034 | FBgn0037517 |
| FBgn0016984 | FBgn0052479 | FBgn0010100 | FBgn0036824 | FBgn0026620 | FBgn0037788 | FBgn0053223 |
| FBgn0058196 | FBgn0086758 | FBgn0030648 | FBgn0030904 | FBgn0000719 | FBgn0010247 | FBgn0085670 |
| FBgn0029658 | FBgn0085483 | FBgn0262570 | FBgn0015575 | FBgn0031258 | FBgn0051158 | FBgn0250841 |
| FBgn0260745 | FBgn0037229 | FBgn0027279 | FBgn0031645 | FBgn0031738 | FBgn0004868 | FBgn0039155 |
| FBgn0011204 | FBgn0053080 | FBgn0037607 | FBgn0261090 | FBgn0052666 | FBgn0052720 | FBgn0025702 |
| FBgn0051274 | FBgn0052066 | FBgn0028515 | FBgn0043841 | FBgn0030483 | FBgn0263031 | FBgn0037853 |
| FBgn0052639 | FBgn0037551 | FBgn0001987 | FBgn0033777 | FBgn0036896 | FBgn0037592 | FBgn0037197 |
| FBgn0032026 | FBgn0033310 | FBgn0010825 | FBgn0085488 | FBgn0263144 | FBgn0032646 | FBgn0262160 |
| FBgn0039060 | FBgn0035432 | FBgn0051472 | FBgn0001090 | FBgn0051955 | FBgn0261551 | FBgn0038972 |
| FBgn0050428 | FBgn0028943 | FBgn0041626 | FBgn0036461 | FBgn0259233 | FBgn0037171 | FBgn0001197 |

|             |             |             |             |             |             |             |
|-------------|-------------|-------------|-------------|-------------|-------------|-------------|
| FBgn0086347 | FBgn0262866 | FBgn0041621 | FBgn0041582 | FBgn0010383 | FBgn0033725 | FBgn0029849 |
| FBgn0038072 | FBgn0031347 | FBgn0035144 | FBgn0010768 | FBgn0038874 | FBgn0033113 | FBgn0004893 |
| FBgn0052425 | FBgn0002524 | FBgn0033913 | FBgn0004171 | FBgn0033308 | FBgn0031255 | FBgn0015522 |
| FBgn0031190 | FBgn0004914 | FBgn0052521 | FBgn0052440 | FBgn0028583 | FBgn0027580 | FBgn0010651 |
| FBgn0039738 | FBgn0053229 | FBgn0025637 | FBgn0030837 | FBgn0020445 | FBgn0050389 | FBgn0053900 |
| FBgn0030296 | FBgn0031913 | FBgn0038638 | FBgn0032399 | FBgn0003900 | FBgn0039061 | FBgn0033835 |
| FBgn0037553 | FBgn0086365 | FBgn0015777 | FBgn0035344 | FBgn0026376 | FBgn0010877 | FBgn0039500 |
| FBgn0025740 | FBgn0010504 | FBgn0040658 | FBgn0259745 | FBgn0259220 | FBgn0033928 | FBgn0053814 |
| FBgn0261020 | FBgn0033982 | FBgn0032264 | FBgn0010226 | FBgn0022774 | FBgn0038256 | FBgn0013770 |
| FBgn0262081 | FBgn0034398 | FBgn0030790 | FBgn0026323 | FBgn0001624 | FBgn0035903 | FBgn0035091 |
| FBgn0086370 | FBgn0086686 | FBgn0030391 | FBgn0260429 | FBgn0033504 | FBgn0035159 | FBgn0262891 |
| FBgn0037807 | FBgn0034200 | FBgn0085323 | FBgn0038535 | FBgn0016930 | FBgn0014863 | FBgn0262484 |
| FBgn0263077 | FBgn0029766 | FBgn0035238 | FBgn0001230 | FBgn0038277 | FBgn0040028 | FBgn0052672 |
| FBgn0037852 | FBgn0027581 | FBgn0261619 | FBgn0033423 | FBgn0263780 | FBgn0024249 | FBgn0032482 |
| FBgn0034093 | FBgn0032731 | FBgn0033471 | FBgn0085512 | FBgn0026570 | FBgn0036759 | FBgn0036663 |
| FBgn0264307 | FBgn0032061 | FBgn0263655 | FBgn0053849 | FBgn0003654 | FBgn0000244 | FBgn0031703 |
| FBgn0011481 | FBgn0036945 | FBgn0003866 | FBgn0032024 | FBgn0030964 | FBgn0016075 | FBgn0003892 |
| FBgn0052944 | FBgn0039714 | FBgn0026630 | FBgn0261570 | FBgn0052695 | FBgn0033495 | FBgn0262983 |
| FBgn0085403 | FBgn0037163 | FBgn0039681 | FBgn0052407 | FBgn0002733 | FBgn0020414 | FBgn0261451 |
| FBgn0004860 | FBgn0029003 | FBgn0000259 | FBgn0063493 | FBgn0000064 | FBgn0036843 | FBgn0014388 |
| FBgn0033942 | FBgn0053542 | FBgn0261985 | FBgn0031213 | FBgn0032078 | FBgn0034996 | FBgn0039299 |
| FBgn0031356 | FBgn0053136 | FBgn0035768 | FBgn0011715 | FBgn0038747 | FBgn0011207 | FBgn0000409 |
| FBgn0035896 | FBgn0034997 | FBgn0033724 | FBgn0051559 | FBgn0032079 | FBgn0260945 | FBgn0036428 |
| FBgn0034389 | FBgn0051542 | FBgn0029092 | FBgn0010389 | FBgn0050403 | FBgn0028734 | FBgn0035495 |
| FBgn0259215 | FBgn0085306 | FBgn0262699 | FBgn0050115 | FBgn0001967 | FBgn0033814 | FBgn0024236 |
| FBgn0010395 | FBgn0261113 | FBgn0023214 | FBgn0051975 | FBgn0002643 | FBgn0034225 | FBgn0052772 |
| FBgn0023169 | FBgn0053267 | FBgn0016693 | FBgn0051976 | FBgn0052699 | FBgn0042131 | FBgn0085292 |
| FBgn0262872 | FBgn0051637 | FBgn0053105 | FBgn0260934 | FBgn0013277 | FBgn0001149 | FBgn0026315 |
| FBgn0004903 | FBgn0053094 | FBgn0260463 | FBgn0263072 | FBgn0027865 | FBgn0035763 | FBgn0053300 |
| FBgn0031800 | FBgn0030520 | FBgn0013276 | FBgn0052192 | FBgn0016031 | FBgn0085450 | FBgn0036111 |
| FBgn0030056 | FBgn0014184 | FBgn0031972 | FBgn0030575 | FBgn0030521 | FBgn0086902 | FBgn0029979 |
| FBgn0030120 | FBgn0035982 | FBgn0262127 | FBgn0063923 | FBgn0014949 | FBgn0259682 | FBgn0038595 |
| FBgn0032699 | FBgn0086901 | FBgn0014135 | FBgn0033836 | FBgn0029824 | FBgn0000042 | FBgn0033127 |
| FBgn0039223 | FBgn0030065 | FBgn0262103 | FBgn0002577 | FBgn0053494 | FBgn0033717 | FBgn0034861 |
| FBgn0085261 | FBgn0261552 | FBgn0032618 | FBgn0004797 | FBgn0052783 | FBgn0029738 | FBgn0034758 |
| FBgn0037676 | FBgn0052380 | FBgn0085342 | FBgn0028387 | FBgn0035719 | FBgn0085293 | FBgn0032006 |
| FBgn0013717 | FBgn0010039 | FBgn0085334 | FBgn0003447 | FBgn0024510 | FBgn0051053 | FBgn0250842 |
| FBgn0039059 | FBgn0010620 | FBgn0011586 | FBgn0034570 | FBgn0029686 | FBgn0259176 | FBgn0051287 |
| FBgn0036941 | FBgn0021768 | FBgn0261703 | FBgn0058005 | FBgn0040071 | FBgn0032805 | FBgn0010042 |
| FBgn0036950 | FBgn0039739 | FBgn0260997 | FBgn0004435 | FBgn0039328 | FBgn0030451 | FBgn0053056 |
| FBgn0029968 | FBgn0030589 | FBgn0031762 | FBgn0063495 | FBgn0052656 | FBgn0261593 | FBgn0004047 |
| FBgn0033371 | FBgn0030796 | FBgn0034083 | FBgn0039590 | FBgn0028331 | FBgn0017581 | FBgn0010786 |
| FBgn0000357 | FBgn0028936 | FBgn0004607 | FBgn0022029 | FBgn0017558 | FBgn0037989 | FBgn0259101 |

|             |             |             |             |             |             |             |
|-------------|-------------|-------------|-------------|-------------|-------------|-------------|
| FBgn0031697 | FBgn0053864 | FBgn0001297 | FBgn0034999 | FBgn0033355 | FBgn0051974 | FBgn0033978 |
| FBgn0010905 | FBgn0053832 | FBgn0032130 | FBgn0035142 | FBgn0035173 | FBgn0015542 | FBgn0037166 |
| FBgn0036861 | FBgn0053841 | FBgn0023528 | FBgn0038261 | FBgn0038709 | FBgn0043791 | FBgn0036738 |
| FBgn0031758 | FBgn0053812 | FBgn0031118 | FBgn0011217 | FBgn0259749 | FBgn0037482 | FBgn0042177 |
| FBgn0031196 | FBgn0053877 | FBgn0261808 | FBgn0263391 | FBgn0016917 | FBgn0038966 | FBgn0024250 |
| FBgn0023000 | FBgn0053901 | FBgn0036816 | FBgn0040475 | FBgn0028490 | FBgn0259734 | FBgn0030603 |
| FBgn0033183 | FBgn0051618 | FBgn0263996 | FBgn0031389 | FBgn0031099 | FBgn0030239 | FBgn0261514 |
| FBgn0053054 | FBgn0085538 | FBgn0032901 | FBgn0264324 | FBgn0261674 | FBgn0039830 | FBgn0014455 |
| FBgn0036199 | FBgn0030191 | FBgn0261793 | FBgn0037013 | FBgn0035146 | FBgn0011706 | FBgn0025381 |
| FBgn0002921 | FBgn0032775 | FBgn0016926 | FBgn0001404 | FBgn0052574 | FBgn0032891 | FBgn0001941 |
| FBgn0040551 | FBgn0027932 | FBgn0003979 | FBgn0028506 | FBgn0036622 | FBgn0034436 | FBgn0034800 |
| FBgn0026602 | FBgn0033153 | FBgn0045823 | FBgn0032253 | FBgn0262680 | FBgn0063492 | FBgn0052675 |
| FBgn0038037 | FBgn0037195 | FBgn0003495 | FBgn0263316 | FBgn0085442 | FBgn0000356 | FBgn0001301 |
| FBgn0032005 | FBgn0032400 | FBgn0024986 | FBgn0030863 | FBgn0004638 | FBgn0262954 | FBgn0039480 |
| FBgn0030731 | FBgn0030418 | FBgn0004057 | FBgn0032666 | FBgn0031954 | FBgn0036155 | FBgn0030600 |
| FBgn0033391 | FBgn0085388 | FBgn0000261 | FBgn0038018 | FBgn0000473 | FBgn0032434 | FBgn0011274 |
| FBgn0262985 | FBgn0020622 | FBgn0032485 | FBgn0264652 | FBgn0035811 | FBgn0259143 | FBgn0002607 |
| FBgn0031681 | FBgn0002868 | FBgn0000479 | FBgn0025628 | FBgn0034840 | FBgn0035131 | FBgn0037224 |
| FBgn0027569 | FBgn0052318 | FBgn0027590 | FBgn0034290 | FBgn0011763 | FBgn0037974 | FBgn0243512 |
| FBgn0051627 | FBgn0001168 | FBgn0046687 | FBgn0027506 | FBgn0011760 | FBgn0040099 | FBgn0011770 |
| FBgn0029894 | FBgn0031937 | FBgn0085446 | FBgn0036871 | FBgn0032888 | FBgn0027945 | FBgn0001224 |
| FBgn0050377 | FBgn0038981 | FBgn0050456 | FBgn0260746 | FBgn0035444 | FBgn0050345 | FBgn0039848 |
| FBgn0260972 | FBgn0054010 | FBgn0038721 | FBgn0005630 | FBgn0050095 | FBgn0014427 | FBgn0050323 |
| FBgn0051635 | FBgn0052581 | FBgn0262947 | FBgn0033056 | FBgn0261545 | FBgn0039376 | FBgn0040070 |
| FBgn0262975 | FBgn0086899 | FBgn0026409 | FBgn0250911 | FBgn0054021 | FBgn0052152 | FBgn0029639 |
| FBgn0032039 | FBgn0262563 | FBgn0002716 | FBgn0035357 | FBgn0050015 | FBgn0033476 | FBgn0052495 |
| FBgn0037720 | FBgn0029155 | FBgn0052580 | FBgn0033584 | FBgn0259699 | FBgn0032455 | FBgn0028978 |
| FBgn0050342 | FBgn0037227 | FBgn0030052 | FBgn0026250 | FBgn0259700 | FBgn0261458 | FBgn0038286 |
| FBgn0051406 | FBgn0262353 | FBgn0042111 | FBgn0037506 | FBgn0010583 | FBgn0032585 | FBgn0050104 |
| FBgn0036287 | FBgn0052676 | FBgn0036770 | FBgn0028494 | FBgn0038105 | FBgn0013799 | FBgn0012036 |
| FBgn0030336 | FBgn0261625 | FBgn0261955 | FBgn0031462 | FBgn0031128 | FBgn0037685 | FBgn0085201 |
| FBgn0015622 | FBgn0038846 | FBgn0260817 | FBgn0030881 | FBgn0261477 | FBgn0026262 | FBgn0010388 |
| FBgn0052179 | FBgn0038290 | FBgn0051816 | FBgn0015790 | FBgn0052633 | FBgn0026404 | FBgn0004359 |
| FBgn0026878 | FBgn0262142 | FBgn0036212 | FBgn0261673 | FBgn0263220 | FBgn0011283 | FBgn0030309 |
| FBgn0085478 | FBgn0005672 | FBgn0014037 | FBgn0033309 | FBgn0038168 | FBgn0034590 | FBgn0033926 |
| FBgn0037385 | FBgn0035983 | FBgn0052638 | FBgn0051865 | FBgn0001248 | FBgn0261682 | FBgn0040383 |
| FBgn0000212 | FBgn0015577 | FBgn0028491 | FBgn0003204 | FBgn0013576 | FBgn0261285 | FBgn0036814 |
| FBgn0262888 | FBgn0052237 | FBgn0260768 | FBgn0041342 | FBgn0029980 | FBgn0031457 | FBgn0033124 |
| FBgn0030469 | FBgn0032123 | FBgn0034802 | FBgn0083919 | FBgn0052068 | FBgn0016119 | FBgn0040813 |
| FBgn0263246 | FBgn0051858 | FBgn0261547 | FBgn0040338 | FBgn0031998 | FBgn0005278 | FBgn0036373 |
| FBgn0037635 | FBgn0031148 | FBgn0034399 | FBgn0029791 | FBgn0028343 | FBgn0261931 | FBgn0023549 |
| FBgn0086782 | FBgn0264090 | FBgn0028573 | FBgn0031896 | FBgn0032022 | FBgn0036626 | FBgn0000054 |
| FBgn0052819 | FBgn0038852 | FBgn0035975 | FBgn0029131 | FBgn0004066 | FBgn0029690 | FBgn0051956 |

|             |             |             |             |             |             |             |
|-------------|-------------|-------------|-------------|-------------|-------------|-------------|
| FBgn0004629 | FBgn0035086 | FBgn0031197 | FBgn0038309 | FBgn0027621 | FBgn0044823 | FBgn0051279 |
| FBgn0262567 | FBgn0030659 | FBgn0015714 | FBgn0016059 | FBgn0031261 | FBgn0034886 | FBgn0034390 |
| FBgn0261618 | FBgn0028577 | FBgn0033739 | FBgn0052185 | FBgn0262057 | FBgn0042206 | FBgn0030993 |
| FBgn0032029 | FBgn0024814 | FBgn0051901 | FBgn0003896 | FBgn0031914 | FBgn0030462 | FBgn0063491 |
| FBgn0259926 | FBgn0022382 | FBgn0024321 | FBgn0041182 | FBgn0026576 | FBgn0003267 | FBgn0261574 |
| FBgn0032484 | FBgn0025865 | FBgn0002932 | FBgn0033134 | FBgn0040929 | FBgn0032886 | FBgn0062413 |
| FBgn0031257 | FBgn0062565 | FBgn0040718 | FBgn0039321 | FBgn0052820 | FBgn0028563 | FBgn0051211 |
| FBgn0030834 | FBgn0013275 | FBgn0264493 | FBgn0031883 | FBgn0001142 | FBgn0086674 | FBgn0259227 |
| FBgn0043025 | FBgn0261859 | FBgn0001148 | FBgn0015924 | FBgn0011739 | FBgn0085188 | FBgn0264477 |
| FBgn0030485 | FBgn0032889 | FBgn0004228 | FBgn0034595 | FBgn0031359 | FBgn0010422 | FBgn0004390 |
| FBgn0027108 | FBgn0053866 | FBgn0063494 | FBgn0262035 | FBgn0032586 | FBgn0052822 | FBgn0051675 |
| FBgn0051415 | FBgn0051232 | FBgn0020257 | FBgn0000416 | FBgn0033627 | FBgn0030989 | FBgn0261461 |
| FBgn0085550 | FBgn0013763 | FBgn0040600 | FBgn0042173 | FBgn0053460 | FBgn0014467 | FBgn0039177 |
| FBgn0029506 | FBgn0034753 | FBgn0085787 | FBgn0034583 | FBgn0016123 | FBgn0036842 | FBgn0031011 |
| FBgn0264478 | FBgn0014163 | FBgn0014133 | FBgn0040395 | FBgn0028704 | FBgn0004368 | FBgn0010406 |
| FBgn0031126 | FBgn0032772 | FBgn0003118 | FBgn0029896 | FBgn0037260 | FBgn0033247 | FBgn0034218 |
| FBgn0038100 | FBgn0259739 | FBgn0020304 | FBgn0261847 | FBgn0037021 | FBgn0053093 |             |
| FBgn0262792 | FBgn0036518 | FBgn0025814 | FBgn0263353 | FBgn0030060 | FBgn0261501 |             |
| FBgn0004396 | FBgn0023129 | FBgn0263773 | FBgn0033051 | FBgn0262102 | FBgn0039044 |             |
| FBgn0032023 | FBgn0004907 | FBgn0010385 | FBgn0035425 | FBgn0262604 | FBgn0036152 |             |
| FBgn0263240 | FBgn0023083 | FBgn0035904 | FBgn0021760 | FBgn0039858 | FBgn0053470 |             |
| FBgn0034198 | FBgn0031950 | FBgn0086676 | FBgn0030362 | FBgn0027339 | FBgn0000099 |             |

**Table S4: List of genes in Cluster 1**

|             |             |             |             |             |             |
|-------------|-------------|-------------|-------------|-------------|-------------|
| FBgn0053217 | FBgn0034638 | FBgn0001218 | FBgn0052152 | FBgn0037057 | FBgn0260632 |
| FBgn0025637 | FBgn0034631 | FBgn0030391 | FBgn0036503 | FBgn0053054 | FBgn0011274 |
| FBgn0040383 | FBgn0067102 | FBgn0040309 | FBgn0014002 | FBgn0052440 | FBgn0032693 |
| FBgn0040398 | FBgn0013272 | FBgn0004047 | FBgn0026409 | FBgn0037207 | FBgn0032770 |
| FBgn0040338 | FBgn0034718 | FBgn0026713 | FBgn0029167 | FBgn0041621 | FBgn0041789 |
| FBgn0025642 | FBgn0011211 | FBgn0030582 | FBgn0086708 | FBgn0053113 | FBgn0024245 |
| FBgn0028550 | FBgn0003900 | FBgn0052594 | FBgn0036316 | FBgn0001941 | FBgn0005672 |
| FBgn0025381 | FBgn0034802 | FBgn0030596 | FBgn0022709 | FBgn0000308 | FBgn0037506 |
| FBgn0023507 | FBgn0034870 | FBgn0030589 | FBgn0053265 | FBgn0040949 | FBgn0086372 |
| FBgn0024984 | FBgn0011236 | FBgn0030663 | FBgn0028573 | FBgn0015623 | FBgn0037482 |
| FBgn0024980 | FBgn0025806 | FBgn0030659 | FBgn0052056 | FBgn0259749 | FBgn0000071 |
| FBgn0004647 | FBgn0034997 | FBgn0001092 | FBgn0040475 | FBgn0051637 | FBgn0003884 |
| FBgn0029639 | FBgn0005636 | FBgn0052580 | FBgn0001226 | FBgn0031888 | FBgn0004780 |
| FBgn0015565 | FBgn0034999 | FBgn0030731 | FBgn0023129 | FBgn0051908 | FBgn0243512 |
| FBgn0000221 | FBgn0003888 | FBgn0004066 | FBgn0001225 | FBgn0011283 | FBgn0062412 |
| FBgn0029707 | FBgn0041582 | FBgn0052572 | FBgn0001229 | FBgn0031904 | FBgn0037646 |
| FBgn0029737 | FBgn0035022 | FBgn0260748 | FBgn0040827 | FBgn0261800 | FBgn0043791 |
| FBgn0004368 | FBgn0035085 | FBgn0260747 | FBgn0000357 | FBgn0045038 | FBgn0037720 |
| FBgn0029766 | FBgn0035091 | FBgn0030834 | FBgn0000355 | FBgn0261822 | FBgn0037731 |
| FBgn0029813 | FBgn0035083 | FBgn0030880 | FBgn0035904 | FBgn0032022 | FBgn0002868 |
| FBgn0052758 | FBgn0050428 | FBgn0027087 | FBgn0035811 | FBgn0053194 | FBgn0037852 |
| FBgn0029849 | FBgn0004919 | FBgn0010383 | FBgn0052380 | FBgn0028394 | FBgn0040259 |
| FBgn0029853 | FBgn0035147 | FBgn0027335 | FBgn0035626 | FBgn0019809 | FBgn0037874 |
| FBgn0261955 | FBgn0035189 | FBgn0030941 | FBgn0016031 | FBgn0040070 | FBgn0051211 |
| FBgn0029878 | FBgn0010786 | FBgn0030933 | FBgn0031148 | FBgn0032167 | FBgn0260745 |
| FBgn0028360 | FBgn0027547 | FBgn0259834 | FBgn0031126 | FBgn0086347 | FBgn0017581 |
| FBgn0029895 | FBgn0035309 | FBgn0030985 | FBgn0031646 | FBgn0032330 | FBgn0010038 |
| FBgn0029894 | FBgn0010909 | FBgn0027621 | FBgn0051777 | FBgn0053129 | FBgn0038037 |
| FBgn0027108 | FBgn0035388 | FBgn0031037 | FBgn0031461 | FBgn0032364 | FBgn0038020 |
| FBgn0029935 | FBgn0052280 | FBgn0031054 | FBgn0031457 | FBgn0028490 | FBgn0086687 |
| FBgn0029975 | FBgn0015585 | FBgn0036859 | FBgn0031381 | FBgn0051866 | FBgn0013279 |
| FBgn0027280 | FBgn0035498 | FBgn0036843 | FBgn0003557 | FBgn0003145 | FBgn0038074 |
| FBgn0029979 | FBgn0264693 | FBgn0036816 | FBgn0040718 | FBgn0263598 | FBgn0005671 |
| FBgn0261592 | FBgn0003321 | FBgn0036814 | FBgn0031302 | FBgn0032485 | FBgn0038100 |
| FBgn0020653 | FBgn0003360 | FBgn0011706 | FBgn0031307 | FBgn0032484 | FBgn0040551 |
| FBgn0041629 | FBgn0003411 | FBgn0003997 | FBgn0016926 | FBgn0027348 | FBgn0038149 |
| FBgn0030093 | FBgn0001145 | FBgn0036770 | FBgn0010583 | FBgn0002524 | FBgn0038132 |
| FBgn0086450 | FBgn0030300 | FBgn0010352 | FBgn0031261 | FBgn0028506 | FBgn0038220 |
| FBgn0052672 | FBgn0030318 | FBgn0036663 | FBgn0025683 | FBgn0020416 | FBgn0013767 |
| FBgn0052675 | FBgn0014133 | FBgn0004569 | FBgn0052425 | FBgn0020415 | FBgn0024321 |
| FBgn0016984 | FBgn0030309 | FBgn0014163 | FBgn0028978 | FBgn0040985 | FBgn0086686 |
| FBgn0000395 | FBgn0262740 | FBgn0036623 | FBgn0026179 | FBgn0032646 | FBgn0004629 |

|             |             |             |             |             |             |
|-------------|-------------|-------------|-------------|-------------|-------------|
| FBgn0038261 | FBgn0026562 | FBgn0034198 | FBgn0003090 | FBgn0011742 | FBgn0035444 |
| FBgn0038277 | FBgn0039494 | FBgn0034158 | FBgn0002930 | FBgn0020762 | FBgn0037553 |
| FBgn0011217 | FBgn0042111 | FBgn0034160 | FBgn0011764 | FBgn0025574 | FBgn0050502 |
| FBgn0038290 | FBgn0039487 | FBgn0034093 | FBgn0032720 | FBgn0030797 | FBgn0052772 |
| FBgn0038347 | FBgn0040609 | FBgn0053463 | FBgn0025885 | FBgn0033649 | FBgn0052666 |
| FBgn0003117 | FBgn0039500 | FBgn0083919 | FBgn0259481 | FBgn0034861 | FBgn0052626 |
| FBgn0038412 | FBgn0027494 | FBgn0013750 | FBgn0050489 | FBgn0037819 | FBgn0036211 |
| FBgn0038407 | FBgn0046258 | FBgn0033982 | FBgn0003892 | FBgn0261808 | FBgn0261618 |
| FBgn0038419 | FBgn0002865 | FBgn0013773 | FBgn0005278 | FBgn0038286 | FBgn0036493 |
| FBgn0038460 | FBgn0039593 | FBgn0015714 | FBgn0041607 | FBgn0038309 | FBgn0037676 |
| FBgn0038484 | FBgn0039613 | FBgn0013772 | FBgn0086676 | FBgn0039026 | FBgn0260768 |
| FBgn0038504 | FBgn0039637 | FBgn0001332 | FBgn0031883 | FBgn0042110 | FBgn0039528 |
| FBgn0010389 | FBgn0015622 | FBgn0050197 | FBgn0032456 | FBgn0045761 | FBgn0028343 |
| FBgn0038595 | FBgn0051038 | FBgn0010397 | FBgn0053557 | FBgn0058002 | FBgn0051314 |
| FBgn0038638 | FBgn0039756 | FBgn0050069 | FBgn0053814 | FBgn0058196 | FBgn0011754 |
| FBgn0038645 | FBgn0086355 | FBgn0033913 | FBgn0053816 | FBgn0003495 | FBgn0004861 |
| FBgn0038660 | FBgn0015221 | FBgn0033926 | FBgn0053823 | FBgn0030349 | FBgn0034321 |
| FBgn0010768 | FBgn0039776 | FBgn0261270 | FBgn0053841 | FBgn0034012 | FBgn0030964 |
| FBgn0038682 | FBgn0010015 | FBgn0004638 | FBgn0053850 | FBgn0001248 | FBgn0022787 |
| FBgn0261285 | FBgn0002413 | FBgn0033786 | FBgn0053859 | FBgn0052196 | FBgn0085442 |
| FBgn0051216 | FBgn0039830 | FBgn0003326 | FBgn0053883 | FBgn0032943 | FBgn0032123 |
| FBgn0014135 | FBgn0261988 | FBgn0023167 | FBgn0053889 | FBgn0013576 | FBgn0023479 |
| FBgn0026753 | FBgn0039848 | FBgn0033706 | FBgn0053901 | FBgn0050022 | FBgn0259821 |
| FBgn0038721 | FBgn0000546 | FBgn0014184 | FBgn0053926 | FBgn0051145 | FBgn0263316 |
| FBgn0038720 | FBgn0029131 | FBgn0033584 | FBgn0010438 | FBgn0052944 | FBgn0262519 |
| FBgn0053094 | FBgn0033095 | FBgn0050015 | FBgn0020496 | FBgn0033308 | FBgn0034083 |
| FBgn0264357 | FBgn0262736 | FBgn0033518 | FBgn0030863 | FBgn0034420 | FBgn0036212 |
| FBgn0038852 | FBgn0034501 | FBgn0261014 | FBgn0024182 | FBgn0002931 | FBgn0025391 |
| FBgn0046763 | FBgn0003887 | FBgn0262169 | FBgn0034139 | FBgn0086899 | FBgn0037715 |
| FBgn0011766 | FBgn0010053 | FBgn0016078 | FBgn0001223 | FBgn0261461 | FBgn0053260 |
| FBgn0038966 | FBgn0010651 | FBgn0050344 | FBgn0024251 | FBgn0259220 | FBgn0261508 |
| FBgn0039025 | FBgn0023214 | FBgn0033367 | FBgn0001228 | FBgn0263780 | FBgn0027561 |
| FBgn0039060 | FBgn0063498 | FBgn0040777 | FBgn0010704 | FBgn0025628 | FBgn0053346 |
| FBgn0039059 | FBgn0063492 | FBgn0033309 | FBgn0052699 | FBgn0034639 | FBgn0005634 |
| FBgn0039098 | FBgn0034354 | FBgn0050362 | FBgn0033015 | FBgn0028988 | FBgn0020304 |
| FBgn0039155 | FBgn0003067 | FBgn0050364 | FBgn0058470 | FBgn0008654 | FBgn0261545 |
| FBgn0019952 | FBgn0034313 | FBgn0033247 | FBgn0085323 | FBgn0053329 | FBgn0261547 |
| FBgn0003134 | FBgn0034290 | FBgn0263121 | FBgn0085354 | FBgn0050115 | FBgn0261549 |
| FBgn0046685 | FBgn0028953 | FBgn0033204 | FBgn0085359 | FBgn0051627 | FBgn0261617 |
| FBgn0039209 | FBgn0050104 | FBgn0042135 | FBgn0085365 | FBgn0052638 | FBgn0261570 |
| FBgn0039303 | FBgn0034224 | FBgn0033183 | FBgn0086901 | FBgn0259174 | FBgn0032889 |
| FBgn0039321 | FBgn0028956 | FBgn0263240 | FBgn0085478 | FBgn0034405 | FBgn0261625 |
| FBgn0039464 | FBgn0034219 | FBgn0033127 | FBgn0001624 | FBgn0039798 | FBgn0261636 |

|             |             |             |             |             |             |
|-------------|-------------|-------------|-------------|-------------|-------------|
| FBgn0032036 | FBgn0262686 | FBgn0051668 | FBgn0027598 | FBgn0031257 | FBgn0052529 |
| FBgn0261859 | FBgn0031359 | FBgn0032721 | FBgn0033312 | FBgn0029866 | FBgn0033402 |
| FBgn0263593 | FBgn0053267 | FBgn0086902 | FBgn0027493 | FBgn0030351 | FBgn0036428 |
| FBgn0261931 | FBgn0015801 | FBgn0262719 | FBgn0085512 | FBgn0011661 | FBgn0040765 |
| FBgn0264495 | FBgn0000567 | FBgn0029880 | FBgn0036030 | FBgn0032935 | FBgn0036844 |
| FBgn0003209 | FBgn0262793 | FBgn0035087 | FBgn0042125 | FBgn0037521 | FBgn0030743 |
| FBgn0026439 | FBgn0021768 | FBgn0263346 | FBgn0036684 | FBgn0030521 | FBgn0039858 |
| FBgn0035049 | FBgn0262823 | FBgn0263355 | FBgn0026144 | FBgn0030400 | FBgn0041210 |
| FBgn0262103 | FBgn0262846 | FBgn0037635 | FBgn0041184 | FBgn0003175 | FBgn0001186 |
| FBgn0262142 | FBgn0004868 | FBgn0038846 | FBgn0031697 | FBgn0033777 | FBgn0028990 |
| FBgn0003300 | FBgn0262890 | FBgn0037222 | FBgn0250823 | FBgn0033782 | FBgn0004828 |
| FBgn0035872 | FBgn0025865 | FBgn0031758 | FBgn0261793 | FBgn0052103 | FBgn0032586 |
| FBgn0262353 | FBgn0262947 | FBgn0028369 | FBgn0000017 | FBgn0003204 | FBgn0026090 |
| FBgn0262362 | FBgn0261985 | FBgn0001224 | FBgn0085410 | FBgn0029657 | FBgn0260635 |
| FBgn0259740 | FBgn0261550 | FBgn0011826 | FBgn0260934 | FBgn0031871 | FBgn0263865 |
| FBgn0025702 | FBgn0037974 | FBgn0026259 | FBgn0264324 | FBgn0023407 | FBgn0016119 |
| FBgn0262484 | FBgn0262975 | FBgn0013765 | FBgn0040212 | FBgn0028387 | FBgn0020513 |
| FBgn0016920 | FBgn0035578 | FBgn0033421 | FBgn0027581 | FBgn0037486 | FBgn0030935 |
| FBgn0000253 | FBgn0029092 | FBgn0030648 | FBgn0003396 | FBgn0036288 | FBgn0261688 |
| FBgn0035558 | FBgn0000568 | FBgn0262468 | FBgn0033639 | FBgn0020412 | FBgn0261259 |
| FBgn0052369 | FBgn0004893 | FBgn0263655 | FBgn0051974 | FBgn0014011 | FBgn0035132 |
| FBgn0262579 | FBgn0031571 | FBgn0261703 | FBgn0051635 | FBgn0031150 | FBgn0051324 |
| FBgn0039492 | FBgn0086448 | FBgn0030869 | FBgn0250867 | FBgn0033063 | FBgn0262893 |
| FBgn0259938 | FBgn0030028 | FBgn0263749 | FBgn0020622 | FBgn0042175 |             |

**Table S5: List of hBRG1 interactors**

The table shows Mascot scores (Prot\_score), count of distinct sequences for each protein (prot\_sequences) and number of unique peptides for each protein (pep\_isunique). Proteins with at least two identified peptides, at least one unique peptide, a score above 20, and a score at least twice as high as in the negative control samples were considered positive and are included in the table.

| Prot_acc    | Prot_score | Prot_sequence | Pep_isunique |
|-------------|------------|---------------|--------------|
| ACINU_HUMAN | 69         | 8             | 8            |
| ACL6A_HUMAN | 215        | 18            | 18           |
| ACTB_HUMAN  | 284        | 17            | 4            |
| ACTG_HUMAN  | 284        | 17            | 4            |
| ACTN1_HUMAN | 128        | 15            | 5            |
| ACTN4_HUMAN | 211        | 26            | 17           |
| ADT2_HUMAN  | 50         | 9             | 3            |
| ADT3_HUMAN  | 47         | 8             | 2            |
| ADT4_HUMAN  | 41         | 4             | 1            |
| AKAP8_HUMAN | 36         | 7             | 7            |
| ALBU_HUMAN  | 168        | 12            | 12           |
| AQR_HUMAN   | 90         | 13            | 13           |
| ARI1A_HUMAN | 538        | 52            | 49           |
| ARI1B_HUMAN | 370        | 39            | 36           |
| ARID2_HUMAN | 38         | 19            | 19           |
| ATPA_HUMAN  | 130        | 10            | 10           |
| ATPB_HUMAN  | 62         | 9             | 9            |
| ATRX_HUMAN  | 35         | 4             | 4            |
| BCL7B_HUMAN | 37         | 3             | 3            |
| BCL7C_HUMAN | 44         | 3             | 3            |
| BD1L1_HUMAN | 33         | 5             | 5            |
| BIP_HUMAN   | 45         | 4             | 2            |
| BPTF_HUMAN  | 38         | 5             | 5            |
| BROMI_HUMAN | 24         | 2             | 1            |
| BYST_HUMAN  | 69         | 6             | 6            |
| CCAR1_HUMAN | 24         | 9             | 9            |
| CCAR2_HUMAN | 53         | 8             | 8            |
| CDC5L_HUMAN | 48         | 7             | 7            |
| CH60_HUMAN  | 27         | 4             | 4            |
| CHD4_HUMAN  | 202        | 36            | 29           |
| CHERP_HUMAN | 53         | 9             | 9            |
| CLH1_HUMAN  | 55         | 12            | 12           |
| CNTLN_HUMAN | 26         | 2             | 2            |
| CO4A_HUMAN  | 29         | 2             | 2            |
| CO4B_HUMAN  | 29         | 2             | 2            |
| CPSF1_HUMAN | 30         | 4             | 4            |
| CPSF2_HUMAN | 32         | 3             | 3            |
| CRNL1_HUMAN | 41         | 2             | 2            |



|             |     |    |    |
|-------------|-----|----|----|
| CUL7_HUMAN  | 34  | 4  | 4  |
| DAZP1_HUMAN | 26  | 2  | 2  |
| DDX1_HUMAN  | 26  | 5  | 5  |
| DDX17_HUMAN | 162 | 20 | 13 |
| DDX3X_HUMAN | 108 | 15 | 14 |
| DDX5_HUMAN  | 122 | 16 | 9  |
| DHX15_HUMAN | 137 | 23 | 23 |
| DHX30_HUMAN | 44  | 4  | 4  |
| DHX34_HUMAN | 31  | 2  | 2  |
| DHX9_HUMAN  | 247 | 31 | 31 |
| DREB_HUMAN  | 28  | 3  | 3  |
| DSG2_HUMAN  | 75  | 7  | 7  |
| DSRAD_HUMAN | 68  | 11 | 11 |
| DX39A_HUMAN | 74  | 10 | 2  |
| DX39B_HUMAN | 59  | 9  | 1  |
| DYH5_HUMAN  | 29  | 3  | 3  |
| EF1A1_HUMAN | 30  | 6  | 6  |
| EF1A3_HUMAN | 30  | 6  | 6  |
| EF1G_HUMAN  | 52  | 5  | 5  |
| ELAV1_HUMAN | 100 | 8  | 8  |
| FILA2_HUMAN | 65  | 5  | 5  |
| FIP1_HUMAN  | 43  | 2  | 2  |
| FLNA_HUMAN  | 30  | 8  | 8  |
| FLOT2_HUMAN | 32  | 2  | 2  |
| FUBP3_HUMAN | 51  | 7  | 7  |
| FUS_HUMAN   | 68  | 6  | 3  |
| G3BP1_HUMAN | 50  | 4  | 4  |
| GOGA1_HUMAN | 34  | 2  | 1  |
| GRP75_HUMAN | 162 | 16 | 16 |
| H2B3B_HUMAN | 72  | 2  | 2  |
| H31_HUMAN   | 25  | 3  | 3  |
| H31T_HUMAN  | 25  | 3  | 3  |
| H32_HUMAN   | 25  | 3  | 3  |
| H33_HUMAN   | 25  | 3  | 3  |
| HEAT1_HUMAN | 107 | 6  | 6  |
| HNRDL_HUMAN | 27  | 6  | 4  |
| HNRH1_HUMAN | 254 | 16 | 6  |
| HNRH2_HUMAN | 67  | 17 | 8  |
| HNRL1_HUMAN | 46  | 2  | 2  |
| HNRL2_HUMAN | 66  | 8  | 7  |
| HNRL1_HUMAN | 33  | 2  | 2  |
| HNRPC_HUMAN | 185 | 15 | 9  |
| HNRPD_HUMAN | 38  | 6  | 5  |
| HNRPK_HUMAN | 198 | 14 | 14 |
| HNRPL_HUMAN | 219 | 17 | 17 |
| HNRPM_HUMAN | 368 | 23 | 23 |

|             |     |    |    |
|-------------|-----|----|----|
| HNRPU_HUMAN | 121 | 12 | 12 |
| HS71A_HUMAN | 54  | 14 | 7  |
| HS71B_HUMAN | 54  | 14 | 7  |
| HSP76_HUMAN | 65  | 6  | 2  |
| HSP77_HUMAN | 54  | 14 | 7  |
| HSP7C_HUMAN | 136 | 12 | 6  |
| IF2B3_HUMAN | 22  | 2  | 2  |
| IF2G_HUMAN  | 29  | 2  | 2  |
| IF4A1_HUMAN | 50  | 3  | 1  |
| IF4A3_HUMAN | 74  | 15 | 13 |
| ILF3_HUMAN  | 134 | 13 | 11 |
| IMA1_HUMAN  | 54  | 4  | 4  |
| IMB1_HUMAN  | 74  | 14 | 14 |
| ISY1_HUMAN  | 63  | 2  | 2  |
| KHDR1_HUMAN | 45  | 5  | 3  |
| LACTB_HUMAN | 37  | 4  | 4  |
| LARP4_HUMAN | 25  | 3  | 3  |
| LEG1_HUMAN  | 23  | 2  | 2  |
| LG3BP_HUMAN | 30  | 2  | 2  |
| LMNA_HUMAN  | 461 | 31 | 30 |
| LMNB1_HUMAN | 83  | 6  | 5  |
| LMNB2_HUMAN | 33  | 4  | 3  |
| LMO7_HUMAN  | 139 | 8  | 8  |
| LPPRC_HUMAN | 30  | 7  | 7  |
| MATR3_HUMAN | 359 | 28 | 28 |
| MCM2_HUMAN  | 45  | 6  | 6  |
| MCM3_HUMAN  | 69  | 15 | 15 |
| MCM4_HUMAN  | 69  | 10 | 10 |
| MCM5_HUMAN  | 38  | 10 | 10 |
| MCM6_HUMAN  | 71  | 8  | 8  |
| MCM7_HUMAN  | 69  | 13 | 13 |
| MTA2_HUMAN  | 36  | 7  | 7  |
| MTREX_HUMAN | 30  | 5  | 5  |
| NCBP1_HUMAN | 70  | 2  | 2  |
| NH2L1_HUMAN | 23  | 3  | 3  |
| NOLC1_HUMAN | 23  | 3  | 3  |
| NPM_HUMAN   | 93  | 6  | 6  |
| NU205_HUMAN | 35  | 3  | 3  |
| NUMA1_HUMAN | 81  | 11 | 11 |
| NUP93_HUMAN | 40  | 3  | 3  |
| OST48_HUMAN | 24  | 4  | 4  |
| P66B_HUMAN  | 35  | 5  | 5  |
| PACN3_HUMAN | 46  | 4  | 4  |
| PB1_HUMAN   | 100 | 11 | 11 |
| PCBP2_HUMAN | 26  | 3  | 3  |
| PDCD6_HUMAN | 53  | 4  | 4  |

|             |     |    |    |
|-------------|-----|----|----|
| PELP1_HUMAN | 38  | 5  | 5  |
| PHF5A_HUMAN | 62  | 3  | 3  |
| PININ_HUMAN | 23  | 9  | 9  |
| PLAK_HUMAN  | 149 | 20 | 20 |
| PLEC_HUMAN  | 101 | 27 | 27 |
| PPB1_HUMAN  | 29  | 5  | 5  |
| PPBN_HUMAN  | 29  | 5  | 5  |
| PPIB_HUMAN  | 26  | 4  | 4  |
| PR40A_HUMAN | 32  | 6  | 6  |
| PRKDC_HUMAN | 56  | 23 | 23 |
| PRP19_HUMAN | 33  | 6  | 5  |
| PRP31_HUMAN | 44  | 3  | 3  |
| PRP6_HUMAN  | 105 | 14 | 14 |
| PRP8_HUMAN  | 153 | 46 | 46 |
| PRPF3_HUMAN | 32  | 2  | 2  |
| PSPC1_HUMAN | 74  | 9  | 7  |
| QCR2_HUMAN  | 39  | 3  | 3  |
| RAGP1_HUMAN | 22  | 3  | 3  |
| RBBP4_HUMAN | 38  | 9  | 5  |
| RBBP7_HUMAN | 38  | 5  | 1  |
| RBM10_HUMAN | 95  | 8  | 8  |
| RBM14_HUMAN | 64  | 5  | 5  |
| RBM25_HUMAN | 31  | 5  | 5  |
| RBM4_HUMAN  | 33  | 3  | 3  |
| RBP56_HUMAN | 34  | 4  | 1  |
| REQU_HUMAN  | 143 | 9  | 9  |
| RIF1_HUMAN  | 31  | 6  | 6  |
| RIOX1_HUMAN | 30  | 3  | 3  |
| RL12_HUMAN  | 57  | 3  | 3  |
| RL40_HUMAN  | 34  | 5  | 5  |
| RLA0_HUMAN  | 44  | 11 | 11 |
| ROA1_HUMAN  | 101 | 11 | 9  |
| ROA3_HUMAN  | 180 | 11 | 9  |
| ROAA_HUMAN  | 65  | 7  | 6  |
| RPB1_HUMAN  | 65  | 11 | 11 |
| RPB2_HUMAN  | 37  | 5  | 5  |
| RPN1_HUMAN  | 62  | 9  | 9  |
| RPN2_HUMAN  | 59  | 5  | 5  |
| RS12_HUMAN  | 24  | 2  | 2  |
| RS27A_HUMAN | 34  | 5  | 5  |
| RSSA_HUMAN  | 74  | 6  | 6  |
| RTCB_HUMAN  | 24  | 4  | 4  |
| RUSC1_HUMAN | 30  | 2  | 2  |
| RUVB1_HUMAN | 70  | 11 | 11 |
| RUVB2_HUMAN | 41  | 8  | 8  |
| S10A8_HUMAN | 21  | 3  | 3  |

|             |      |    |    |
|-------------|------|----|----|
| SAFB1_HUMAN | 69   | 5  | 3  |
| SAFB2_HUMAN | 55   | 4  | 2  |
| SEM5B_HUMAN | 24   | 2  | 2  |
| SF01_HUMAN  | 42   | 5  | 5  |
| SF3A1_HUMAN | 79   | 9  | 9  |
| SF3A3_HUMAN | 36   | 6  | 6  |
| SF3B1_HUMAN | 172  | 33 | 33 |
| SF3B2_HUMAN | 136  | 19 | 19 |
| SF3B3_HUMAN | 128  | 19 | 19 |
| SIN3A_HUMAN | 47   | 2  | 2  |
| SMC1A_HUMAN | 38   | 10 | 10 |
| SMCA2_HUMAN | 674  | 59 | 31 |
| SMCA4_HUMAN | 1034 | 68 | 40 |
| SMCE1_HUMAN | 237  | 20 | 20 |
| SMRC1_HUMAN | 458  | 44 | 32 |
| SMRC2_HUMAN | 457  | 46 | 34 |
| SMRD1_HUMAN | 277  | 26 | 20 |
| SMRD2_HUMAN | 149  | 24 | 19 |
| SMRD3_HUMAN | 137  | 16 | 8  |
| SMU1_HUMAN  | 20   | 3  | 3  |
| SNF5_HUMAN  | 66   | 12 | 12 |
| SNUT1_HUMAN | 31   | 7  | 7  |
| SPF45_HUMAN | 24   | 8  | 8  |
| SPTN1_HUMAN | 159  | 19 | 19 |
| SPTN4_HUMAN | 30   | 3  | 2  |
| SR140_HUMAN | 112  | 21 | 21 |
| SRRT_HUMAN  | 79   | 15 | 14 |
| SRSF1_HUMAN | 58   | 4  | 4  |
| SRSF2_HUMAN | 73   | 5  | 2  |
| SRSF4_HUMAN | 55   | 3  | 2  |
| SRSF5_HUMAN | 55   | 2  | 1  |
| SSBP_HUMAN  | 31   | 2  | 2  |
| STIM1_HUMAN | 26   | 3  | 3  |
| STRBP_HUMAN | 50   | 3  | 1  |
| SUGP2_HUMAN | 28   | 5  | 5  |
| SYF1_HUMAN  | 64   | 6  | 6  |
| TBB4B_HUMAN | 28   | 4  | 1  |
| TBB5_HUMAN  | 28   | 4  | 1  |
| TBL3_HUMAN  | 38   | 2  | 2  |
| THOC1_HUMAN | 276  | 23 | 23 |
| THOC2_HUMAN | 144  | 33 | 33 |
| THOC3_HUMAN | 25   | 6  | 6  |
| THOC5_HUMAN | 182  | 22 | 22 |
| THOC6_HUMAN | 52   | 7  | 6  |
| THOC7_HUMAN | 91   | 7  | 7  |
| TIF1B_HUMAN | 33   | 4  | 4  |

|             |     |    |    |
|-------------|-----|----|----|
| TOM22_HUMAN | 65  | 2  | 2  |
| TR150_HUMAN | 24  | 2  | 2  |
| U2AF2_HUMAN | 73  | 4  | 4  |
| U520_HUMAN  | 333 | 47 | 47 |
| U5S1_HUMAN  | 94  | 23 | 23 |
| UBB_HUMAN   | 34  | 5  | 5  |
| UBC_HUMAN   | 34  | 5  | 5  |
| WDR18_HUMAN | 31  | 3  | 3  |
| WWC3_HUMAN  | 21  | 2  | 2  |
| XRN2_HUMAN  | 23  | 5  | 5  |
| YBOX1_HUMAN | 32  | 2  | 1  |
| ZCH18_HUMAN | 48  | 3  | 3  |
| ZFR_HUMAN   | 29  | 4  | 4  |
| ZN326_HUMAN | 67  | 8  | 8  |
| ZO1_HUMAN   | 29  | 2  | 2  |

**Table S6: List of hBRM interactors**

The table shows Mascot scores (Prot\_score), count of distinct sequences for each protein (prot\_sequences) and number of unique peptides for each protein (pep\_isunique). Proteins with at least two identified peptides, at least one unique peptide, a score above 20, and a score at least twice as high as in the negative control samples were considered positive and are included in the table.

| Prot_acc    | Prot_score | Prot_sequence | Pep_isunique |
|-------------|------------|---------------|--------------|
| ACAD8_HUMAN | 31         | 2             | 1            |
| ACL6A_HUMAN | 323        | 17            | 17           |
| ACTA_HUMAN  | 46         | 5             | 1            |
| ACTB_HUMAN  | 279        | 19            | 6            |
| ACTG_HUMAN  | 279        | 19            | 6            |
| ACTH_HUMAN  | 46         | 5             | 1            |
| ADT2_HUMAN  | 35         | 6             | 1            |
| ANXA9_HUMAN | 31         | 2             | 1            |
| ARI1A_HUMAN | 373        | 41            | 38           |
| ARI1B_HUMAN | 197        | 38            | 35           |
| ATPA_HUMAN  | 38         | 5             | 5            |
| BASP1_HUMAN | 33         | 4             | 4            |
| BCL7B_HUMAN | 31         | 3             | 3            |
| BCL7C_HUMAN | 30         | 3             | 3            |
| C1QBP_HUMAN | 58         | 3             | 3            |
| CH60_HUMAN  | 28         | 2             | 2            |
| CHD4_HUMAN  | 83         | 13            | 13           |
| CLH1_HUMAN  | 21         | 2             | 2            |
| DCA13_HUMAN | 35         | 2             | 1            |
| DDX17_HUMAN | 96         | 9             | 5            |
| DDX3X_HUMAN | 49         | 4             | 3            |
| DDX3Y_HUMAN | 49         | 4             | 3            |
| DDX5_HUMAN  | 81         | 5             | 1            |
| DHX15_HUMAN | 29         | 4             | 4            |
| DHX9_HUMAN  | 216        | 23            | 23           |
| DNHD1_HUMAN | 31         | 3             | 2            |
| DSC1_HUMAN  | 23         | 2             | 2            |
| DSG1_HUMAN  | 77         | 4             | 4            |
| EF1A1_HUMAN | 34         | 2             | 2            |
| EF1A2_HUMAN | 34         | 2             | 2            |
| EF1A3_HUMAN | 34         | 2             | 2            |
| EPIPL_HUMAN | 24         | 4             | 4            |
| F186A_HUMAN | 29         | 3             | 3            |
| FILA2_HUMAN | 38         | 2             | 2            |
| FUS_HUMAN   | 36         | 4             | 4            |
| GRP75_HUMAN | 64         | 4             | 4            |
| H2B1B_HUMAN | 58         | 2             | 2            |
| H2B1C_HUMAN | 58         | 2             | 2            |

|             |     |    |    |
|-------------|-----|----|----|
| H2B1D_HUMAN | 58  | 2  | 2  |
| H2B1H_HUMAN | 58  | 2  | 2  |
| H2B1J_HUMAN | 58  | 2  | 2  |
| H2B1K_HUMAN | 58  | 2  | 2  |
| H2B1L_HUMAN | 58  | 2  | 2  |
| H2B1N_HUMAN | 58  | 2  | 2  |
| H2B1O_HUMAN | 58  | 2  | 2  |
| H2B2E_HUMAN | 58  | 2  | 2  |
| H2B2F_HUMAN | 58  | 2  | 2  |
| H2B3B_HUMAN | 58  | 2  | 2  |
| H2BFS_HUMAN | 58  | 2  | 2  |
| HNRH2_HUMAN | 76  | 12 | 5  |
| HNRPD_HUMAN | 31  | 4  | 3  |
| HNRPF_HUMAN | 102 | 10 | 8  |
| HNRPL_HUMAN | 66  | 5  | 5  |
| HNRPM_HUMAN | 349 | 20 | 20 |
| HRG_HUMAN   | 30  | 2  | 2  |
| IF4A3_HUMAN | 21  | 3  | 3  |
| LMNB1_HUMAN | 71  | 7  | 6  |
| LMO7_HUMAN  | 80  | 3  | 3  |
| MATR3_HUMAN | 193 | 17 | 17 |
| NEST_HUMAN  | 28  | 2  | 2  |
| NIPS1_HUMAN | 27  | 2  | 2  |
| PEPL_HUMAN  | 38  | 2  | 2  |
| PERI_HUMAN  | 38  | 2  | 1  |
| PLAK_HUMAN  | 51  | 2  | 2  |
| PPB1_HUMAN  | 26  | 4  | 4  |
| PPBN_HUMAN  | 26  | 4  | 4  |
| PRDX1_HUMAN | 26  | 2  | 1  |
| PRDX2_HUMAN | 26  | 3  | 2  |
| RBM14_HUMAN | 44  | 4  | 4  |
| REQU_HUMAN  | 135 | 10 | 10 |
| RL35A_HUMAN | 25  | 2  | 2  |
| RL40_HUMAN  | 22  | 3  | 3  |
| ROA1_HUMAN  | 21  | 5  | 4  |
| RS27A_HUMAN | 22  | 3  | 3  |
| RYR1_HUMAN  | 35  | 4  | 3  |
| SF3B1_HUMAN | 37  | 7  | 7  |
| SF3B2_HUMAN | 32  | 6  | 6  |
| SMCA2_HUMAN | 535 | 53 | 30 |
| SMCA4_HUMAN | 236 | 27 | 4  |
| SMCE1_HUMAN | 326 | 15 | 15 |
| SMRC1_HUMAN | 331 | 36 | 26 |
| SMRC2_HUMAN | 453 | 42 | 32 |
| SMRD1_HUMAN | 199 | 21 | 13 |
| SMRD2_HUMAN | 223 | 24 | 18 |

|             |    |    |    |
|-------------|----|----|----|
| SMRD3_HUMAN | 82 | 19 | 9  |
| SNF5_HUMAN  | 90 | 13 | 13 |
| SR140_HUMAN | 27 | 3  | 3  |
| SRSF1_HUMAN | 32 | 2  | 2  |
| SSXT_HUMAN  | 47 | 2  | 2  |
| SYC2L_HUMAN | 31 | 4  | 3  |
| UBB_HUMAN   | 22 | 3  | 3  |
| UBC_HUMAN   | 22 | 3  | 3  |
| YBOX1_HUMAN | 31 | 4  | 1  |
| ZA2G_HUMAN  | 39 | 2  | 2  |



**Table S7: List of dBRM interactors**

The table shows Mascot scores (Prot\_score), count of distinct sequences for each protein (prot\_sequences) and number of unique peptides for each protein (pep\_isunique). Proteins with at least two identified peptides, at least one unique peptide, a score above 20, and a score at least twice as high as in the negative control samples were considered positive and are included in the table.

| Prot_acc    | Prot_score | Prot_sequence | Pep_isunique |
|-------------|------------|---------------|--------------|
| 1433E_DROME | 157        | 6             | 4            |
| 1433Z_DROME | 109        | 6             | 4            |
| ACT1_DROME  | 312        | 15            | 4            |
| ACT3_DROME  | 160        | 12            | 1            |
| ACT5_DROME  | 160        | 12            | 1            |
| ADT_DROME   | 142        | 13            | 13           |
| AGO2_DROME  | 248        | 21            | 21           |
| ANKHM_DROME | 22         | 5             | 5            |
| ANXB9_DROME | 130        | 7             | 7            |
| ARF1_DROME  | 57         | 2             | 2            |
| AT5F1_DROME | 20         | 2             | 2            |
| ATP5H_DROME | 25         | 2             | 2            |
| ATPA_DROME  | 488        | 16            | 16           |
| ATPB_DROME  | 556        | 19            | 19           |
| ATPO_DROME  | 33         | 3             | 3            |
| BIP_DROME   | 553        | 19            | 14           |
| BRM_DROME   | 1058       | 37            | 37           |
| C12E1_DROME | 29         | 2             | 2            |
| CALR_DROME  | 199        | 8             | 8            |
| CANB_DROME  | 130        | 10            | 8            |
| CARM1_DROME | 44         | 3             | 3            |
| CATA_DROME  | 39         | 5             | 5            |
| CAZ_DROME   | 741        | 7             | 7            |
| CH60_DROME  | 211        | 8             | 8            |
| CLH_DROME   | 80         | 12            | 12           |
| CMC_DROME   | 25         | 2             | 2            |
| CO4A1_DROME | 34         | 3             | 3            |
| COPIA_DROME | 213        | 10            | 10           |
| CPR1_DROME  | 43         | 3             | 3            |
| CPSF1_DROME | 52         | 2             | 2            |
| CPSF6_DROME | 37         | 2             | 2            |
| CSK2A_DROME | 70         | 4             | 4            |
| DCO_DROME   | 78         | 4             | 4            |
| DDX17_DROME | 205        | 13            | 12           |
| DDX3_DROME  | 2847       | 41            | 40           |
| DDX55_DROME | 21         | 2             | 2            |
| DDX6_DROME  | 25         | 3             | 3            |

|             |      |    |    |
|-------------|------|----|----|
| DKC1_DROME  | 62   | 6  | 6  |
| DOM_DROME   | 29   | 3  | 3  |
| EF1A1_DROME | 293  | 11 | 11 |
| EF1G_DROME  | 71   | 9  | 9  |
| ENO_DROME   | 76   | 4  | 4  |
| FBRL_DROME  | 366  | 14 | 14 |
| FKB39_DROME | 48   | 3  | 3  |
| FMR1_DROME  | 30   | 2  | 2  |
| FUSIL_DROME | 29   | 3  | 3  |
| GAG17_DROME | 90   | 7  | 7  |
| GAG2_DROME  | 175  | 12 | 12 |
| GALE_DROME  | 43   | 4  | 4  |
| GAR1_DROME  | 113  | 7  | 7  |
| GAWKY_DROME | 123  | 8  | 8  |
| GBLP_DROME  | 102  | 13 | 13 |
| GLYR1_DROME | 87   | 3  | 3  |
| GYS_DROME   | 114  | 7  | 7  |
| H2A_DROME   | 57   | 3  | 3  |
| H2B_DROME   | 38   | 3  | 3  |
| H4_DROME    | 55   | 4  | 4  |
| HEMH_DROME  | 42   | 2  | 2  |
| HRS_DROME   | 25   | 4  | 4  |
| HSP68_DROME | 111  | 5  | 3  |
| HSP7D_DROME | 384  | 19 | 13 |
| HSP7E_DROME | 370  | 19 | 19 |
| HSP83_DROME | 284  | 15 | 15 |
| IF4A_DROME  | 31   | 6  | 6  |
| ILF2_DROME  | 540  | 13 | 13 |
| KPYK_DROME  | 67   | 2  | 2  |
| L2CC_DROME  | 247  | 11 | 11 |
| LAM0_DROME  | 77   | 8  | 8  |
| LARK_DROME  | 88   | 9  | 9  |
| LASP1_DROME | 27   | 2  | 2  |
| LIG_DROME   | 591  | 10 | 10 |
| MLE_DROME   | 2228 | 67 | 67 |
| NGLY1_DROME | 22   | 2  | 2  |
| NONA_DROME  | 531  | 20 | 14 |
| OSA_DROME   | 165  | 16 | 13 |
| OST48_DROME | 78   | 4  | 4  |
| PABP_DROME  | 850  | 26 | 26 |
| PABP2_DROME | 46   | 2  | 2  |
| PDI_DROME   | 158  | 15 | 15 |
| PP12_DROME  | 91   | 4  | 4  |
| PRDX1_DROME | 152  | 5  | 5  |
| PROML_DROME | 54   | 6  | 6  |
| PRP39_DROME | 270  | 18 | 18 |

|             |      |    |    |
|-------------|------|----|----|
| R10AB_DROME | 23   | 2  | 2  |
| RAGP1_DROME | 80   | 4  | 4  |
| RB27C_DROME | 4763 | 19 | 19 |
| RB87F_DROME | 3070 | 22 | 19 |
| RB97D_DROME | 181  | 13 | 13 |
| RFA1_DROME  | 31   | 2  | 2  |
| RL17_DROME  | 53   | 2  | 2  |
| RL4_DROME   | 31   | 2  | 2  |
| RLA0_DROME  | 124  | 5  | 5  |
| RLA1_DROME  | 48   | 3  | 3  |
| RLA2_DROME  | 28   | 2  | 2  |
| ROA1_DROME  | 3555 | 21 | 18 |
| RPA1_DROME  | 30   | 4  | 3  |
| RPB1_DROME  | 1037 | 48 | 47 |
| RPB2_DROME  | 686  | 41 | 41 |
| RS3_DROME   | 34   | 3  | 3  |
| RS3A_DROME  | 26   | 2  | 2  |
| RS4_DROME   | 25   | 2  | 2  |
| RSSA_DROME  | 61   | 4  | 1  |
| RUVB1_DROME | 44   | 3  | 3  |
| RUVB2_DROME | 37   | 2  | 2  |
| SAYP_DROME  | 77   | 9  | 9  |
| SDHA_DROME  | 167  | 12 | 12 |
| SHEP_DROME  | 41   | 2  | 2  |
| SQD_DROME   | 3229 | 12 | 12 |
| SUDX_DROME  | 29   | 2  | 2  |
| TBA1_DROME  | 211  | 12 | 12 |
| TBA3_DROME  | 211  | 12 | 12 |
| TBB1_DROME  | 157  | 8  | 8  |
| TERA_DROME  | 41   | 4  | 4  |
| TMEDA_DROME | 33   | 2  | 2  |
| TMTC4_DROME | 22   | 3  | 3  |
| TTF2_DROME  | 27   | 3  | 3  |
| VATB_DROME  | 37   | 2  | 2  |
| XRN2_DROME  | 422  | 20 | 20 |

**Table S8: List of proteins detected in negative control immunoprecipitations**

The table shows Mascot scores (Prot\_score), count of distinct sequences for each protein (prot\_sequences) and number of unique peptides for each protein (pep\_isunique). Proteins with at least two identified peptides, at least one unique peptide, and a score above 20 are included in the table.

| Prot_acc    | Prot_score | Prot_sequence | Pep_isunique |
|-------------|------------|---------------|--------------|
| ACTB_HUMAN  | 94         | 14            | 5            |
| ACTC_HUMAN  | 91         | 10            | 1            |
| ACTG_HUMAN  | 94         | 14            | 5            |
| ACTN1_HUMAN | 52         | 11            | 1            |
| ACTN4_HUMAN | 98         | 19            | 10           |
| ACTS_HUMAN  | 91         | 10            | 1            |
| ALBU_HUMAN  | 59         | 5             | 5            |
| ANXA2_HUMAN | 65         | 10            | 10           |
| CASPE_HUMAN | 25         | 3             | 3            |
| CNTP4_HUMAN | 39         | 2             | 2            |
| DCR1C_HUMAN | 32         | 2             | 2            |
| DDX17_HUMAN | 38         | 4             | 4            |
| DHX9_HUMAN  | 107        | 21            | 21           |
| DSG1_HUMAN  | 35         | 5             | 5            |
| G3P_HUMAN   | 33         | 7             | 7            |
| GRP75_HUMAN | 29         | 2             | 2            |
| H2B1M_HUMAN | 71         | 4             | 4            |
| H4_HUMAN    | 21         | 3             | 3            |
| HNRH1_HUMAN | 78         | 6             | 4            |
| HNRH3_HUMAN | 35         | 5             | 5            |
| HNRPF_HUMAN | 50         | 3             | 1            |
| HNRPK_HUMAN | 53         | 6             | 6            |
| HNRPL_HUMAN | 30         | 5             | 5            |
| HNRPM_HUMAN | 78         | 8             | 8            |
| HSP7C_HUMAN | 26         | 7             | 2            |
| LMNA_HUMAN  | 219        | 26            | 26           |
| LMO7_HUMAN  | 28         | 8             | 8            |
| MATR3_HUMAN | 42         | 2             | 2            |
| NONO_HUMAN  | 146        | 17            | 15           |
| NPM_HUMAN   | 45         | 5             | 5            |
| NUCL_HUMAN  | 28         | 3             | 3            |
| OCRL_HUMAN  | 31         | 2             | 2            |
| PIP_HUMAN   | 24         | 2             | 2            |
| PTBP1_HUMAN | 38         | 4             | 3            |
| RC3H1_HUMAN | 29         | 2             | 1            |
| ROA2_HUMAN  | 92         | 12            | 12           |
| ROA3_HUMAN  | 38         | 7             | 7            |
| ROAA_HUMAN  | 24         | 3             | 3            |
| SFPQ_HUMAN  | 184        | 12            | 10           |
| SPTB2_HUMAN | 75         | 11            | 11           |

|             |      |    |    |
|-------------|------|----|----|
| SPTN1_HUMAN | 26   | 12 | 12 |
| VIME_HUMAN  | 61   | 13 | 12 |
| ACT3_DROME  | 41   | 6  | 1  |
| ACT4_DROME  | 41   | 6  | 1  |
| ACT5_DROME  | 41   | 6  | 1  |
| ACT6_DROME  | 41   | 6  | 1  |
| ADT_DROME   | 38   | 6  | 6  |
| ANXB9_DROME | 20   | 2  | 2  |
| ATPB_DROME  | 21   | 3  | 3  |
| ATPG_DROME  | 66   | 8  | 8  |
| BIP_DROME   | 127  | 6  | 2  |
| CAZ_DROME   | 309  | 6  | 6  |
| CH60_DROME  | 24   | 2  | 2  |
| CLH_DROME   | 35   | 8  | 8  |
| DDX3_DROME  | 780  | 32 | 32 |
| EF1A1_DROME | 34   | 6  | 6  |
| GAG2_DROME  | 64   | 5  | 5  |
| GNAQ_DROME  | 28   | 2  | 2  |
| H4_DROME    | 20   | 2  | 2  |
| HSP72_DROME | 70   | 3  | 2  |
| HSP73_DROME | 70   | 3  | 2  |
| HSP74_DROME | 70   | 3  | 2  |
| HSP75_DROME | 70   | 3  | 2  |
| HSP7D_DROME | 86   | 6  | 2  |
| HSP7E_DROME | 24   | 5  | 5  |
| HSP83_DROME | 26   | 3  | 3  |
| ILF2_DROME  | 106  | 6  | 6  |
| L2CC_DROME  | 26   | 2  | 2  |
| MLE_DROME   | 822  | 48 | 48 |
| NH2L1_DROME | 31   | 3  | 3  |
| NONA_DROME  | 87   | 5  | 5  |
| PABP_DROME  | 180  | 12 | 12 |
| PRDX1_DROME | 37   | 2  | 2  |
| PRP39_DROME | 23   | 5  | 5  |
| RB27C_DROME | 1134 | 14 | 14 |
| RB87F_DROME | 687  | 19 | 16 |
| RBGPR_DROME | 21   | 3  | 3  |
| RL40_DROME  | 54   | 3  | 3  |
| ROA1_DROME  | 721  | 18 | 15 |
| RPB1_DROME  | 173  | 17 | 17 |
| RPB2_DROME  | 119  | 16 | 16 |
| RS27A_DROME | 54   | 3  | 3  |
| SQD_DROME   | 528  | 9  | 9  |
| UBIQP_DROME | 54   | 3  | 3  |
| VDAC_DROME  | 72   | 3  | 3  |
| XRN2_DROME  | 33   | 4  | 4  |

**Table S9. Expression of 3'-end processing factors analyzed by RNA-seq in dBRM-depleted S2 cells**

| Complex | Factor | FlyBase ID  | Expression levels* |         |
|---------|--------|-------------|--------------------|---------|
|         |        |             | Control            | dBRM-kd |
| CPSF    | CPSF1  | FBgn0024698 | 24,63              | 26,02   |
|         | CPSF2  | FBgn0027873 | 16,87              | 17,16   |
|         | CPSF3  | FBgn0261065 | 23,62              | 21,1    |
|         | CPSF4  | FBgn0015621 | 8,72               | 4,21    |
|         | WDR33  | FBgn0046222 | 13,69              | 12,37   |
|         | FIP1L1 | FBgn0037255 | 15,14              | 9,05    |
| CSTF    | CSTF1  | FBgn0039867 | 8,68               | 7,22    |
|         | CSTF2  | FBgn0027841 | 8,71               | 7,11    |
|         | CSTF3  | FBgn0003559 | 40,06              | 37,95   |
| CFIm    | CFIm25 | FBgn0035987 | 55,24              | 43,11   |
|         | CPSF6  | FBgn0035872 | 28,74              | 22,1    |
| CFIIm   | Pcf11  | FBgn0264962 | ND**               | ND      |
|         | Clp1   | FBgn0033842 | 9,66               | 6,03    |
| Others  | PAP    | FBgn0015949 | 79,85              | 78,18   |
|         | Sym    | FBgn0037371 | 17,94              | 18,86   |
|         | PABP2  | FBgn0005648 | 71,25              | 67,14   |

\* FPKM average calculated from two independent experiments.

\*\* ND, not detected.

## Additional Figures

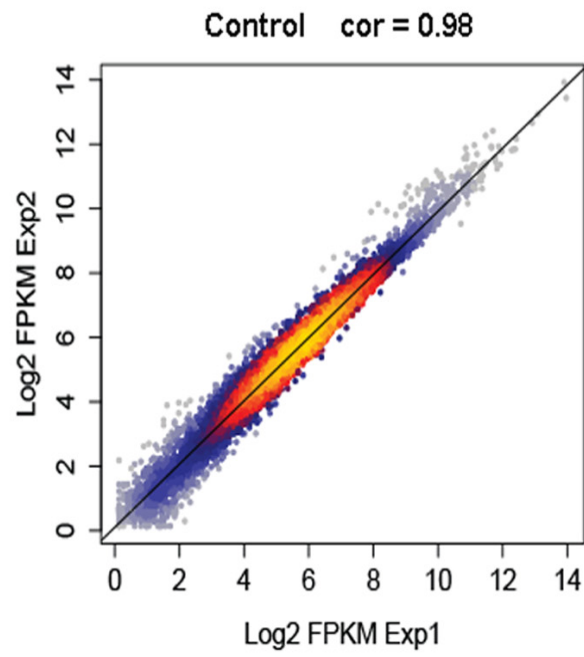

**Figure S1.** RNA-seq experiments: Pearson's correlation analysis of two biological replicates.

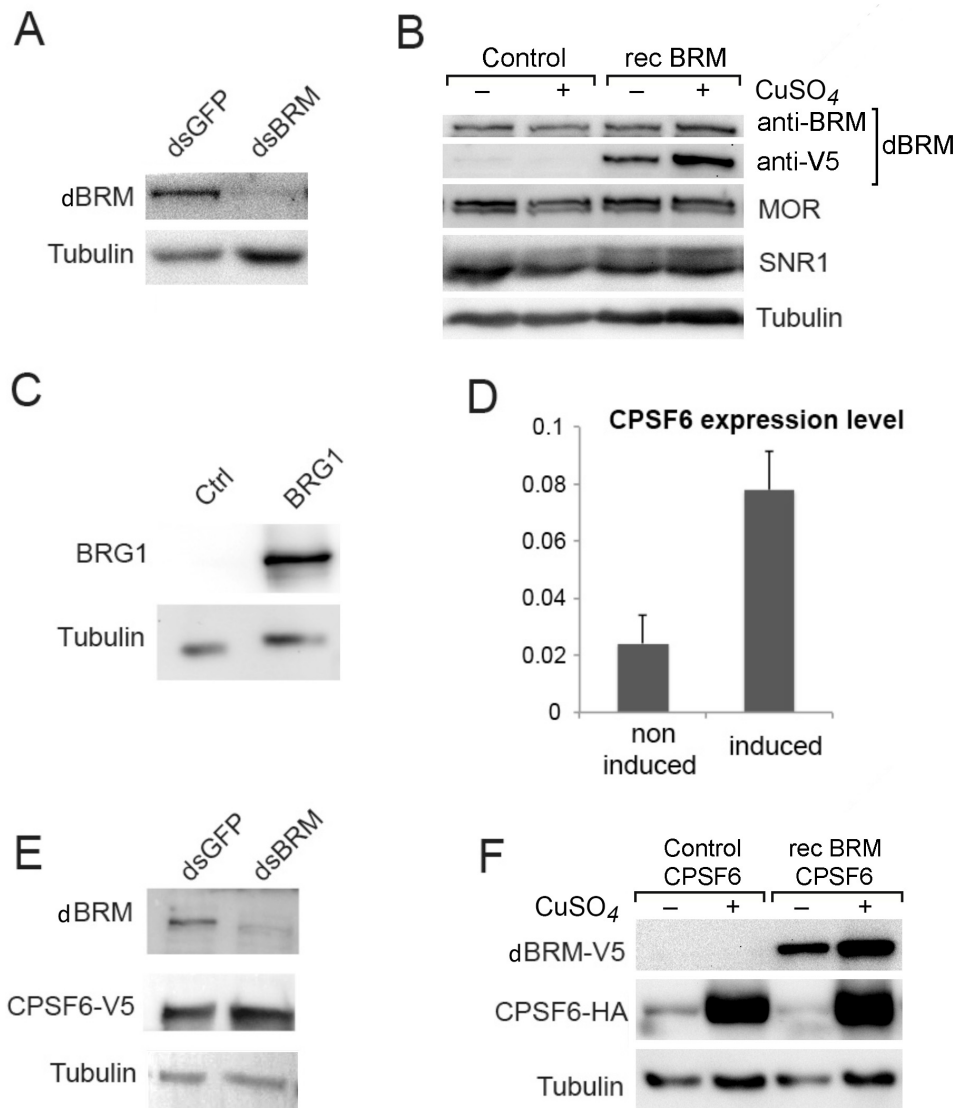

**Figure S2.** Protein levels in RNAi and overexpression experiments

(A) S2 cells were treated by either dsGFP or dsBRM for 48 hours. Protein levels of SWI/SNF core subunits were assessed by Western blotting. The level of dBRM protein was reduced to  $28 \pm 7\%$  ( $n = 3$  independent RNAi experiments) as quantified by blot densitometry.

(B) Stably transfected S2 cells were treated with  $200 \mu\text{M}$   $\text{CuSO}_4$  for 24 h to induce the expression of recombinant BRM, and protein levels were assessed by Western blotting. After  $\text{CuSO}_4$  induction, the levels of dBRM protein were  $31 \pm 18\%$  higher in  $\text{CuSO}_4$ -induced cells than in control cells ( $n = 3$  independent overexpression experiments).

(C) C33A cells expressing hBRG1 or hBRG1 ATPase mutant were harvested 48 h after transfection. Cells transfected with pOPRSVI were used as control. Protein expression was monitored by Western blotting.

(D) S2 cells stably transfected with a plasmid for the expression of CPSF6-V5 were induced with  $200 \mu\text{M}$   $\text{CuSO}_4$  for 24 h. RNA levels were measured by RT-qPCR and normalized to *Act5C* mRNA. The levels of total *CPSF6* mRNA were 3 times higher



after induction. The overexpression of CPSF6-V5 could not be quantified at the protein level due to the lack of antibodies against endogenous CPSF6.

(E) S2 cells that expressed CPSF6-V5 were treated with dsRNA against dBRM or GFP for 48 h. The expression of CPSF6-V5 was induced with 200  $\mu\text{M}$   $\text{CuSO}_4$  for 24 h. Protein expression was analyzed by Western blotting with antibodies against hBRM, V5 and tubulin.

(F) Cells expressing only recBRM or recBRM and recCPSF6 were induced with 200  $\mu\text{M}$   $\text{CuSO}_4$  for 24 h. Protein expression was analyzed by Western blotting with antibodies against V5, HA and tubulin.

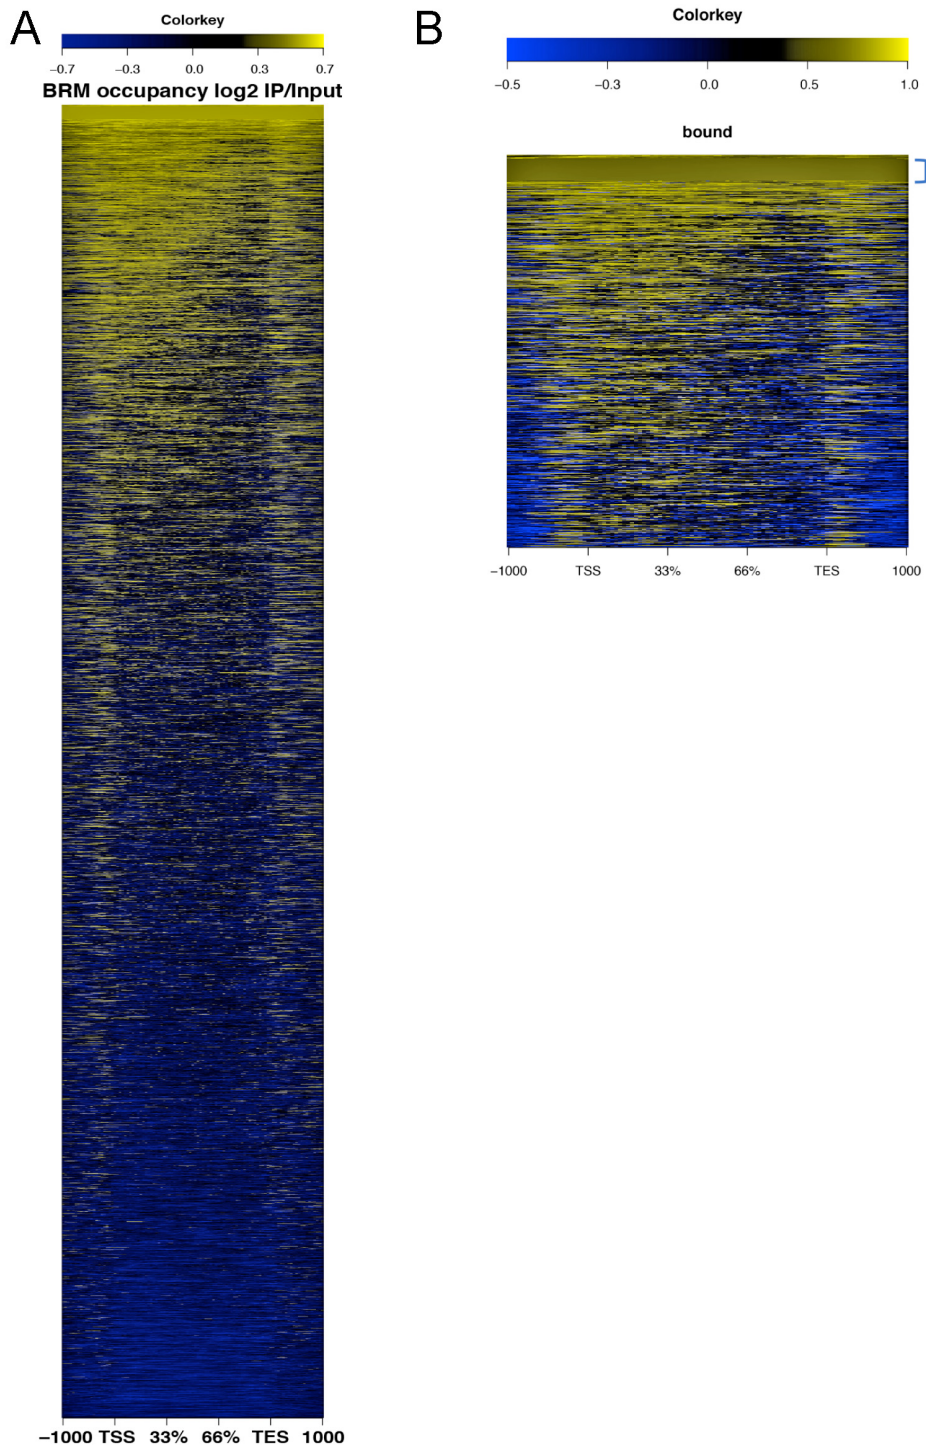

**Figure S3.** dBRM ChIP-seq in S2 cells

An antibody against the endogenous dBRM protein was used for ChIP-seq in S2 cells by Jordán-Pla et al. (BMC Genomics, 2018) and a set of 2521 dBRM-bound genes were identified.

(A) Heat map of dBRM ChIP-seq signals over a region that includes the gene body, 1000 bp upstream of the transcription start site (TSS), and 1000 bp downstream of the cleavage site (TES). The heat map includes all genes.

(B) Heat map including only the 2521 dBRM-bound genes. The bracket in B corresponds to a cluster of histone genes.

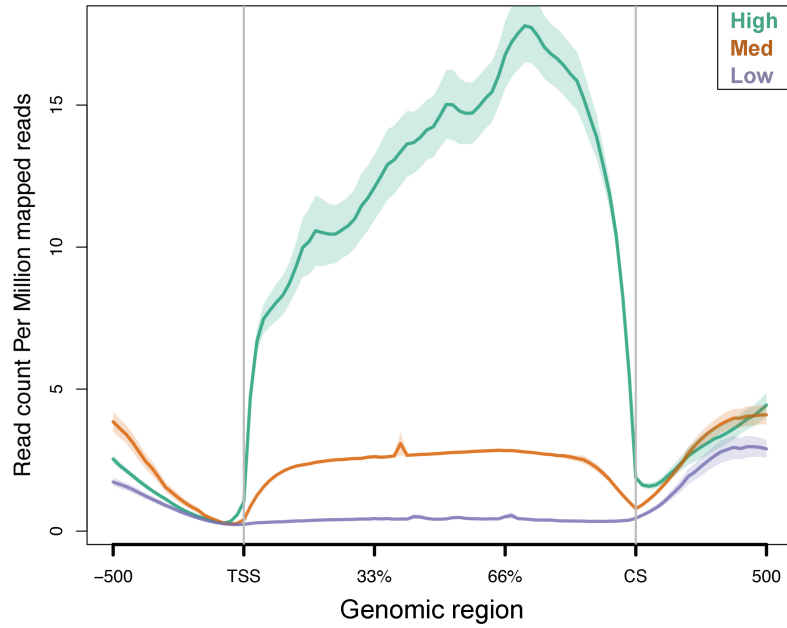

**Figure S4.** Metagenome analysis of RNA reads from S2 control cells (*dsGFP control*) over a genomic region that includes 500 bp upstream and 500 bp downstream of the gene body. The plot shows normalized read counts (Y-axis) in genes with high, middle and low expression levels, as indicated. Transcription start site (TSS), cleavage site (CS) are indicated in the X-axis.

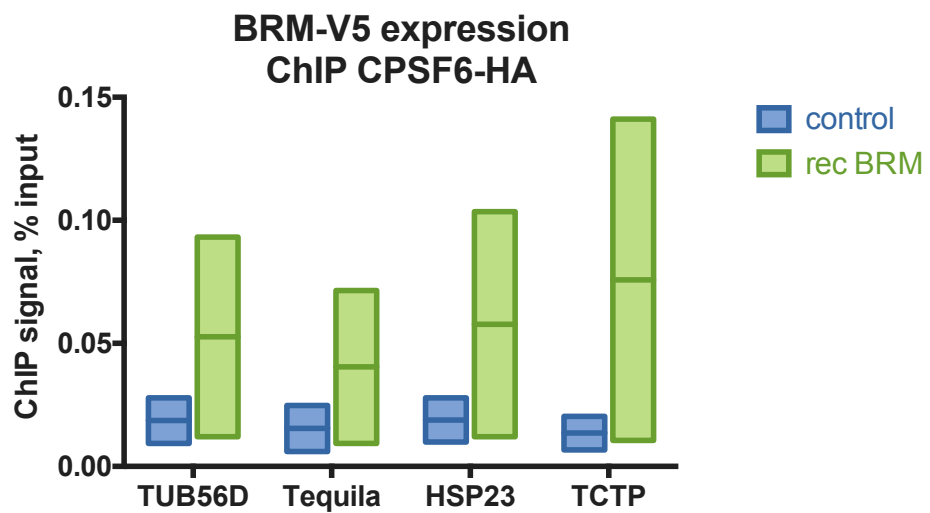

**Figure S5.** The effect of dBRM depletion on the association of CPSF6 to the downstream region of four selected genes from Cluster 1. The plots show averages and standard deviations from two biological replicates.

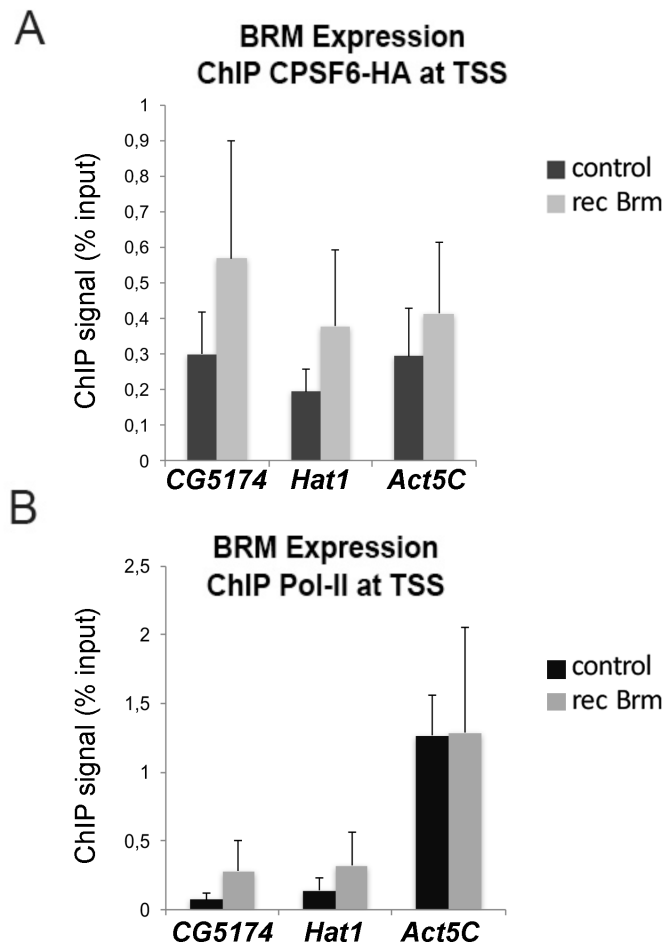

**Figure S6.** CPSF6 and RNAPII occupancy at TSSs. (A-B) ChIP analysis was performed in S2 cells that expressed recBRM. The presence of CPSF (A) and Pol-II (B) at the transcription start region of the *CG5174*, *Hat1* and *Act5C* genes was analyzed by ChIP-qPCR. Antibodies against HA (for CPSF-HA) and Pol-II CTD were used. ChIP signals are represented as percentage of input. A one-sample t-test was used for statistical testing. None of the differences was significant.

## Additional Text

### Primer Sequences

#### For qPCR

|                             |                              |
|-----------------------------|------------------------------|
| Actin 2 F                   | GCACACCCACAAGCTTACACA        |
| Actin 2 R                   | TTGCGCTTTGGGAAATATCTTC       |
| CPSF6 F                     | ATGGCCGACGTGGTCTTGGA         |
| CPSF6 R                     | GGACCGCCTATGTCATCGTA         |
| CG5174 common 3UTR F        | CGTTCCTAATCCGTTGAAA          |
| CG5174 common 3UTR R        | CAACAAATTGGGTGCGATT          |
| CG5174 common 3UTR uncl R   | TCCCAAACATCATTTATCAAAAAG     |
| CG2051 3UTR F               | AGTTGAGGGCCTCGTAGGTT         |
| CG2051 3UTR R               | GCAACATAATGTATTTTGTAAATCAACA |
| CG2051 3UTR uncl R          | ACGTGCACACGGTAATCTGA         |
| Actin 3UTR F                | TCGACTTCGATATCATTTCTGC       |
| Actin 3UTR R                | TCAAGAATCAAAGGAGAAAGCAC      |
| Actin 3UTR uncl R           | GGTGCTACGAAATCCGTTGT         |
| CG5174 5UTR 52 F            | TCGAAAGCGAAAACGAAACT         |
| CG5174 5UTR 213 R           | ATTTTTCTTGCCCTGCTTT          |
| CG2051 5UTR 67 F            | GCTGCAAACACTTAACGGTCA        |
| CG2051 5UTR 216 R           | TTCGAGAGCATCAATCACAAA        |
| Actin 5UTR 14 F             | CCGTTTGAGTTCTTGCTG           |
| Actin 5UTR 113 R            | TTAAGTCTTTCGGTTTGGTGTC       |
| GPRC5A common 3UTR F        | GTGGGCATGGTCTCCTAATG         |
| GPRC5A common 3UTR R        | GCCACCACATCTTTATTGCATAC      |
| GPRC5A 3UTR F               | CCACTCTTTCATGGTGGTGG         |
| GPRC5A 3UTR R               | ACCCAAAGGAAGTGAACCTTG        |
| CD44 common 3UTR F          | CATTGTCAACGGAGAGCTGG         |
| CD44 common 3UTR R          | GCTGTGCTTCCAGAGTTACG         |
| CD44 3UTR F                 | TGTATATTGCTGAGTTGAAAGCACT    |
| CD44 3UTR R                 | CCAGACGGTGCCAGATAAG          |
| SNX8 common 3UTRF           | CTGAGAGGCTGCTTACTGCT         |
| SNX8 common 3UTRR           | TAGGCAAGGCCGTAATGACC         |
| SNX8 3UTR F                 | TGACCTACATTTTGGACGGTTT       |
| SNX8 3UTR R                 | CCCAGGTTGAACGCCTCATA         |
| Actin $\gamma$ common 3UTRF | TGGCTTGGTCACTTCGTGG          |
| Actin $\gamma$ common 3UTRR | AAAACAACCTGGTTCTTGCCAGC      |
| Actin $\gamma$ 3UTR F       | GGCTCCTGTTTGGGGAAGTAG        |
| Actin $\gamma$ 3UTR R       | TTAAGCCGTTTTCTCACCAGC        |

#### For Cloning CPSF6

|                                                             |                              |
|-------------------------------------------------------------|------------------------------|
| CPSF6 cloning SpeI fw                                       | GCACTAGTATGGCCGACGTGGTCTTGGA |
| CPSF6 cloning ApaI V5 rev                                   | TATGGGCCCATGCCGGAACGGTGCTCCT |
| ApaI CPSF6 R+HA tag                                         |                              |
| TATAGGGCCCTCAAGCGTAATCTGGAACATCGTATGGGTAATGCCGGAACGGTGCTCCT |                              |

#### For synthesis of dsRNA

|              |                                                  |
|--------------|--------------------------------------------------|
| Brm BKNT7 F  | taatacgaactcactatagggagaAAGCCCAATCGCATTACAAC     |
| Brm BKNT7 R  | taatacgaactcactatagggagaTGAAGTGTATCAGCCGCTTG     |
| Brm HFAT7 F  | TTAATACGACTCACTATAGGGAGAgtttcgctgtacaataacaatc   |
| Brm HFA T7 R | TTAATACGACTCACTATAGGGAGAatgtggagcaggacttaag      |
| GFP T7 F     | taatacgaactcactatagggagaATGGTGAGCAAGGGCGAGGAGCTG |
| GFP T7 R     | taatacgaactcactatagggagaGCGGTCACGAACTCCAGCAG     |

**For ATAC-qPCR**

|              |                          |
|--------------|--------------------------|
| Adapter F    | AATGATACGGCGACCACCGAGATC |
| CG5174 R     | TCTTGTGGCCTGAAGAAAAA     |
| Hat1 R       | AGTCCGTCTCTGCCGATG       |
| TCTP 3'R     | CAGACAATATCGCCGTTTCG     |
| 3UTR uncl R  | GGTGCTACGAAATCCGTTGT     |
| Hsp70 prom R | TTCGCGAACATTCGAGGCG      |
